# Supplementary material
Source: PubMed Central journal article supplement (PMC8062570)
Supplement: NIHMS1656606-supplement-Supp1.pdf [file NIHMS1656606-supplement-Supp1.pdf]

Supplementary table 1: Characteristics of participants those who returned vs. those who did not return the take-home questionnaire at enrollment in the Agricultural Health Study (n=20,409), Iowa and North Carolina

| Characteristics                 | Returned take home |               |
|---------------------------------|--------------------|---------------|
|                                 | No (n=29478)       | Yes (n=22916) |
| Age (years)                     |                    |               |
| ≤45                             | 16070 (54.5)       | 9657 (42.1)   |
| >45-55                          | 6600 (22.4)        | 5244 (22.9)   |
| >55-65                          | 4549 (15.4)        | 5059 (22.1)   |
| >65                             | 2259 (7.7)         | 2956 (12.9)   |
| Sex                             |                    |               |
| Female                          | 803 (2.7)          | 556 (2.4)     |
| Male                            | 28675 (97.3)       | 22360 (97.6)  |
| Race                            |                    |               |
| Other                           | 1090 (3.7)         | 428 (1.9)     |
| White                           | 27853 (94.5)       | 21986 (95.9)  |
| Missing                         | 535 (1.8)          | 502 (2.2)     |
| State                           |                    |               |
| Iowa                            | 17066 (57.9)       | 14810 (64.6)  |
| North Carolina                  | 12412 (42.1)       | 8106 (35.4)   |
| Marital status                  |                    |               |
| Never married                   | 3153 (10.7)        | 2365 (10.3)   |
| Married/Living as married       | 24472 (83.0)       | 19220 (83.9)  |
| Divorced/Widowed                | 1715 (5.8)         | 1209 (5.3)    |
| Missing                         | 138 (0.5)          | 122 (0.5)     |
| Education                       |                    |               |
| ≤ High school                   | 16638 (56.4)       | 12647 (55.2)  |
| 1-3 year beyond high school     | 6946 (23.6)        | 5173 (22.6)   |
| ≥ College graduate              | 4588 (15.6)        | 4001 (17.5)   |
| Something else                  | 69 (0.2)           | 48 (0.2)      |
| Missing                         | 1237 (4.2)         | 1047 (4.6)    |
| Smoking status                  |                    |               |
| Never                           | 14961 (50.8)       | 11974 (52.3)  |
| Former                          | 8422 (28.6)        | 7568 (33)     |
| Current                         | 5265 (17.9)        | 2922 (12.8)   |
| Missing                         | 830 (2.8)          | 452 (2.0)     |
| Alcohol intake (past 12 months) |                    |               |
| No                              | 8976 (30.4)        | 7869 (34.3)   |
| Yes                             | 18152 (61.6)       | 13813 (60.3)  |
| Missing                         | 2350 (8.0)         | 1234 (5.4)    |
| Overall pesticide lifetime days |                    |               |
| 0-64                            | 8740 (29.6)        | 6535 (28.5)   |
| >64-225                         | 8664 (29.4)        | 7181 (31.3)   |
| >225-458                        | 5856 (19.9)        | 4660 (20.3)   |
| >458                            | 5568 (18.9)        | 4514 (19.7)   |
| Missing                         | 650 (2.2)          | 26 (0.1)      |

Supplementary table 2: Ever-use of pesticide at enrollment in relation to self-reported olfactory impairment reported in the third follow-up in the Agricultural Health Study, excluding head injury

| Pesticides                        | Those who returned the take home and those responded to the head injury question (n=10,162) <sup>a</sup> |                   |
|-----------------------------------|----------------------------------------------------------------------------------------------------------|-------------------|
|                                   | OI (n=1048), n(%)                                                                                        | OR (95% CI)       |
| Insecticide                       | 1022 (97.5)                                                                                              | 1.39 (0.92, 2.10) |
| Organochlorine                    | 721 (69.1)                                                                                               | 1.21 (1.04, 1.41) |
| Aldrin                            | 282 (29.4)                                                                                               | 1.01 (0.83, 1.24) |
| Chlordane                         | 376 (38.1)                                                                                               | 1.27 (1.09, 1.49) |
| Dieldrin                          | 121 (12.6)                                                                                               | 1.20 (0.94, 1.53) |
| DDT                               | 362 (36.9)                                                                                               | 1.13 (0.95, 1.35) |
| Heptachlor                        | 251 (26.1)                                                                                               | 1.10 (0.90, 1.35) |
| Toxaphene                         | 201 (20.5)                                                                                               | 1.24 (1.04, 1.48) |
| Lindane                           | 268 (27.1)                                                                                               | 1.19 (1.02, 1.39) |
| Carbamate                         | 808 (77.2)                                                                                               | 1.37 (1.17, 1.61) |
| Aldicarb                          | 74 (7.6)                                                                                                 | 0.80 (0.60, 1.06) |
| Carbaryl                          | 615 (62.9)                                                                                               | 1.15 (0.98, 1.34) |
| Carbofuran                        | 347 (35.0)                                                                                               | 1.17 (1.01, 1.35) |
| Organophosphate                   | 997 (95.2)                                                                                               | 1.54 (1.14, 2.08) |
| Chlorpyrifos                      | 498 (47.9)                                                                                               | 1.25 (1.10, 1.43) |
| Coumaphos                         | 113 (11.6)                                                                                               | 1.13 (0.91, 1.39) |
| Diazinon                          | 373 (38.1)                                                                                               | 1.11 (0.95, 1.29) |
| Dichlorvos                        | 159 (16.0)                                                                                               | 1.19 (0.98, 1.43) |
| Fonofos                           | 256 (25.6)                                                                                               | 1.03 (0.88, 1.21) |
| Malathion                         | 817 (80.1)                                                                                               | 1.34 (1.13, 1.58) |
| Parathion                         | 180 (18.4)                                                                                               | 1.16 (0.97, 1.39) |
| Phorate                           | 386 (39.1)                                                                                               | 1.02 (0.88, 1.18) |
| Terbufos                          | 434 (43.3)                                                                                               | 1.08 (0.94, 1.24) |
| Trichlorfon                       | 7 (0.7)                                                                                                  | 1.22 (0.55, 2.73) |
| Permethrin (crops)                | 150 (15.2)                                                                                               | 1.27 (1.05, 1.54) |
| Permethrin (animals)              | 169 (16.9)                                                                                               | 1.30 (1.08, 1.57) |
| Fumigant                          | 283 (27.0)                                                                                               | 1.19 (1.01, 1.39) |
| CCl <sub>4</sub> /CS <sub>2</sub> | 96 (9.8)                                                                                                 | 1.36 (1.07, 1.73) |
| Aluminum phosphide                | 59 (6.0)                                                                                                 | 1.18 (0.89, 1.57) |
| Ethylene dibromide                | 33 (3.3)                                                                                                 | 0.91 (0.62, 1.32) |
| Methyl bromide                    | 124 (12.5)                                                                                               | 0.88 (0.68, 1.14) |
| Fungicide                         | 389 (37.2)                                                                                               | 1.12 (0.97, 1.31) |
| Benomyl                           | 93 (9.7)                                                                                                 | 1.30 (0.97, 1.76) |
| Captan                            | 130 (13.1)                                                                                               | 1.17 (0.95, 1.42) |
| Chlorothalonil                    | 59 (6)                                                                                                   | 0.94 (0.68, 1.30) |
| Maneb                             | 87 (8.9)                                                                                                 | 0.85 (0.64, 1.14) |
| Metalaxyl                         | 216 (21.8)                                                                                               | 1.18 (0.98, 1.43) |
| Ziram                             | 17 (1.7)                                                                                                 | 1.23 (0.73, 2.07) |
| Herbicide                         | 1033 (98.6)                                                                                              | 1.07 (0.62, 1.86) |
| Alachlor                          | 615 (61.6)                                                                                               | 1.15 (1.00, 1.32) |
| Butylate                          | 372 (38.0)                                                                                               | 1.05 (0.91, 1.23) |
| Chlorimuron ethyl                 | 370 (37.6)                                                                                               | 1.05 (0.91, 1.21) |
| Dicamba                           | 592 (59.4)                                                                                               | 1.12 (0.95, 1.31) |
| EPTC                              | 226 (22.9)                                                                                               | 1.05 (0.89, 1.24) |
| Glyphosate                        | 857 (82.2)                                                                                               | 1.33 (1.12, 1.58) |
| Imazethapyr                       | 457 (47.1)                                                                                               | 0.96 (0.82, 1.13) |

|                       |            |                   |
|-----------------------|------------|-------------------|
| Metolachlor           | 502 (50.0) | 1.04 (0.90, 1.19) |
| Paraquat              | 230 (23.4) | 1.10 (0.92, 1.30) |
| Pendimethalin         | 442 (44.7) | 1.08 (0.94, 1.24) |
| Petroleum distillates | 543 (55.1) | 1.21 (1.05, 1.39) |
| Trifluralin           | 557 (58.9) | 1.04 (0.88, 1.22) |
| 2,4-D                 | 868 (83.4) | 1.16 (0.97, 1.40) |
| 2,4,5-T               | 305 (31.2) | 1.25 (1.05, 1.48) |
| 2,4,5-TP              | 105 (10.7) | 0.72 (0.57, 0.92) |
| Atrazine              | 808 (77.8) | 1.17 (0.99, 1.39) |
| Cyanazine             | 495 (49.5) | 1.14 (0.98, 1.31) |
| Metribuzin            | 510 (53.3) | 1.03 (0.88, 1.22) |

Abbreviation: 2,4-D, 2,4-Dichlorophenoxyacetic acid; 2,4,5-T, 2,4,5-Trichlorophenoxyacetic acid; 2,4,5-T,P, 2-(2,4,5-trichlorophenoxy) propionic acid; CI, Confidence Intervals; CCl<sub>4</sub>/CS<sub>2</sub>, Carbon tetrachloride/Carbon disulfide 80/20 mix; DDT, Dichlorodiphenyltrichloroethane; EPTC, S-Ethyl dipropylthiocarbamate; OI, Olfactory Impairment; OR, Odds Ratio

Odds ratios are adjusted for age, sex, state of residence, education, smoking status, ever performed following tasks at least once each year (repair engines, replace asbestos brake linings, handle stored grain, work in swine confinement areas, weld and paint), and correlated pesticides (correlated ever-use of pesticides with Spearman correlation  $\geq 0.40$ )

<sup>c</sup>Restricted to participants who returned the take-home questionnaire and those who responded to the question on a history of head injury; those with a history of head injury were excluded

Supplementary table 3: Ever-use of pesticide at enrollment in relation to self-reported olfactory impairment reported in the third follow-up in the Agricultural Health Study, excluding those who reported PD in any survey (n=20,184)

| Pesticides                        | No OI n (%)  | OI n (%)    | OR (95% CI)       |
|-----------------------------------|--------------|-------------|-------------------|
| Insecticide                       | 17161 (94.1) | 1873 (96.2) | 1.42 (1.11, 1.82) |
| Organochlorine                    | 9642 (54.4)  | 1246 (65.4) | 1.29 (1.15, 1.44) |
| Aldrin                            | 3226 (19.4)  | 467 (26.5)  | 1.01 (0.87, 1.18) |
| Chlordane                         | 4464 (26.4)  | 605 (33.3)  | 1.08 (0.96, 1.22) |
| Dieldrin                          | 1150 (6.9)   | 199 (11.3)  | 1.23 (1.02, 1.48) |
| DDT                               | 3918 (23.3)  | 612 (34.0)  | 1.28 (1.13, 1.47) |
| Heptachlor                        | 2795 (16.7)  | 411 (23.2)  | 1.07 (0.92, 1.25) |
| Toxaphene                         | 2400 (14.2)  | 346 (19.2)  | 1.23 (1.08, 1.40) |
| Lindane                           | 3639 (21.5)  | 490 (26.9)  | 1.20 (1.07, 1.34) |
| Carbamate                         | 12163 (67.9) | 1448 (75.5) | 1.40 (1.25, 1.57) |
| Aldicarb                          | 1686 (10.1)  | 164 (9.2)   | 0.93 (0.77, 1.13) |
| Carbaryl                          | 9554 (56.4)  | 1138 (62.6) | 1.24 (1.10, 1.39) |
| Carbofuran                        | 4941 (29.0)  | 629 (34.3)  | 1.16 (1.05, 1.29) |
| Organophosphate                   | 16413 (90.0) | 1823 (93.7) | 1.51 (1.24, 1.84) |
| Chlorpyrifos                      | 7840 (43.3)  | 910 (47.0)  | 1.16 (1.05, 1.27) |
| Coumaphos                         | 1621 (9.7)   | 205 (11.4)  | 1.14 (0.98, 1.33) |
| Diazinon                          | 5615 (33.2)  | 671 (36.9)  | 1.04 (0.93, 1.17) |
| Dichlorvos                        | 2102 (12.4)  | 291 (15.9)  | 1.24 (1.08, 1.43) |
| Fonofos                           | 4033 (23.5)  | 467 (25.3)  | 1.00 (0.89, 1.13) |
| Malathion                         | 12669 (72.8) | 1488 (79.1) | 1.31 (1.16, 1.48) |
| Parathion                         | 2541 (15.1)  | 342 (18.9)  | 1.22 (1.07, 1.39) |
| Phorate                           | 5972 (35.2)  | 691 (38.0)  | 1.00 (0.90, 1.11) |
| Terbufos                          | 7070 (41.2)  | 806 (43.6)  | 1.06 (0.96, 1.17) |
| Trichlorfon                       | 103 (0.6)    | 16 (0.9)    | 1.40 (0.82, 2.38) |
| Permethrin (crops)                | 2321 (13.7)  | 289 (15.9)  | 1.23 (1.08, 1.41) |
| Permethrin (animals)              | 2618 (15.3)  | 330 (18.0)  | 1.25 (1.10, 1.43) |
| Fumigant                          | 4173 (22.9)  | 504 (25.9)  | 1.16 (1.03, 1.31) |
| CCl <sub>4</sub> /CS <sub>2</sub> | 947 (5.6)    | 160 (8.9)   | 1.30 (1.09, 1.56) |
| Aluminum phosphide                | 910 (5.4)    | 106 (5.9)   | 1.06 (0.86, 1.31) |
| Ethylene dibromide                | 618 (3.7)    | 64 (3.5)    | 0.89 (0.68, 1.17) |
| Methyl bromide                    | 2386 (14.0)  | 245 (13.5)  | 0.97 (0.81, 1.17) |
| Fungicide                         | 6486 (35.6)  | 732 (37.7)  | 1.17 (1.05, 1.30) |
| Benomyl                           | 1506 (9.1)   | 170 (9.6)   | 1.03 (0.83, 1.29) |
| Captan                            | 2074 (12.2)  | 276 (15.1)  | 1.24 (1.08, 1.43) |
| Chlorothalonil                    | 1148 (6.8)   | 137 (7.5)   | 1.23 (0.99, 1.54) |
| Maneb                             | 1516 (8.9)   | 177 (9.8)   | 1.10 (0.89, 1.35) |
| Metalaxyl                         | 3733 (21.9)  | 414 (22.8)  | 1.16 (1.01, 1.33) |
| Ziram                             | 252 (1.5)    | 28 (1.6)    | 1.04 (0.70, 1.55) |
| Herbicide                         | 17812 (97.7) | 1915 (98.4) | 1.26 (0.86, 1.84) |
| Alachlor                          | 9593 (55.8)  | 1083 (58.9) | 1.05 (0.95, 1.16) |
| Butylate                          | 5746 (34.1)  | 680 (37.7)  | 1.04 (0.93, 1.17) |
| Chlorimuron ethyl                 | 6451 (37.9)  | 690 (38.1)  | 1.00 (0.90, 1.10) |
| Dicamba                           | 9460 (55.2)  | 1083 (59.1) | 1.11 (0.99, 1.24) |
| EPTC                              | 3648 (21.5)  | 430 (23.6)  | 1.07 (0.95, 1.21) |
| Glyphosate                        | 14004 (77.2) | 1585 (81.8) | 1.36 (1.20, 1.54) |
| Imazethapyr                       | 7860 (46.9)  | 852 (47.6)  | 0.94 (0.84, 1.06) |
| Metolachlor                       | 8304 (48.3)  | 928 (50.1)  | 1.04 (0.94, 1.15) |
| Paraquat                          | 3884 (22.8)  | 456 (25.1)  | 1.16 (1.03, 1.32) |

|                       |              |             |                   |
|-----------------------|--------------|-------------|-------------------|
| Pendimethalin         | 7626 (44.7)  | 838 (46.0)  | 1.05 (0.95, 1.15) |
| Petroleum distillates | 8441 (49.9)  | 1011 (55.7) | 1.18 (1.06, 1.30) |
| Trifluralin           | 9047 (55.4)  | 1047 (60.0) | 1.09 (0.96, 1.23) |
| 2,4-D                 | 14095 (78.0) | 1589 (82.1) | 1.14 (1.00, 1.30) |
| 2,4,5-T               | 3707 (22.1)  | 520 (28.9)  | 1.21 (1.06, 1.38) |
| 2,4,5-T,P             | 1658 (9.9)   | 209 (11.6)  | 0.89 (0.75, 1.07) |
| Atrazine              | 13327 (73.4) | 1484 (76.9) | 1.10 (0.97, 1.24) |
| Cyanazine             | 7714 (45.0)  | 887 (48.2)  | 1.05 (0.94, 1.17) |
| Metribuzin            | 8049 (49.0)  | 948 (53.8)  | 1.06 (0.94, 1.20) |

Abbreviation: 2,4-D, 2,4-Dichlorophenoxyacetic acid; 2,4,5-T, 2,4,5-Trichlorophenoxyacetic acid; 2,4,5-T,P, 2-(2,4,5-trichlorophenoxy) propionic acid; CI, Confidence Intervals; CCl<sub>4</sub>/CS<sub>2</sub>, Carbon tetrachloride/Carbon disulfide 80/20 mix; DDT, Dichlorodiphenyltrichloroethane; EPTC, S-Ethyl dipropylthiocarbamate; OI, Olfactory Impairment; OR, Odds Ratio

Odds ratios are adjusted for age, sex, state of residence, education, smoking status, ever performed following tasks at least once each year (repair engines, replace asbestos brake linings, handle stored grain, work in swine confinement areas, weld and paint), and correlated pesticides (correlated ever-use of pesticides with Spearman correlation  $\geq 0.40$ )

Supplementary table 4: Intensity-weighted lifetime days of use at enrollment in relation to self-reported olfactory impairment in the Agricultural Health Study, excluding those who reported PD in any survey (n=20,184)

| Pesticide               | Exposure <sup>a</sup> | No OI (n (%)) | OI (n (%))  | OR (95% CI)       | p-trend |
|-------------------------|-----------------------|---------------|-------------|-------------------|---------|
| Organochlorine          |                       |               |             |                   |         |
| Aldrin <sup>b</sup>     | Never                 | 8036 (83.9)   | 793 (75.8)  | Ref               | 0.07    |
|                         | >0–315                | 563 (5.9)     | 88 (8.4)    | 1.12 (0.87, 1.45) |         |
|                         | >315–952              | 486 (5.1)     | 69 (6.6)    | 1.00 (0.75, 1.34) |         |
|                         | >952                  | 496 (5.2)     | 96 (9.2)    | 1.29 (0.99, 1.68) |         |
| Chlordane <sup>b</sup>  | Never                 | 8030 (82)     | 806 (73.8)  | Ref               | 0.10    |
|                         | >0–231                | 577 (5.9)     | 97 (8.9)    | 1.41 (1.11, 1.78) |         |
|                         | >231–637              | 606 (6.2)     | 95 (8.7)    | 1.27 (1.00, 1.61) |         |
|                         | >637                  | 583 (6.0)     | 94 (8.6)    | 1.23 (0.96, 1.56) |         |
| Dieldrin <sup>b</sup>   | Never                 | 9316 (96.7)   | 1002 (94.7) | Ref               | 0.85    |
|                         | >0–210                | 112 (1.2)     | 17 (1.6)    | 0.92 (0.55, 1.57) |         |
|                         | >210–653              | 93 (1.0)      | 23 (2.2)    | 1.47 (0.91, 2.36) |         |
|                         | >653                  | 109 (1.1)     | 16 (1.5)    | 0.87 (0.51, 1.50) |         |
| DDT <sup>b</sup>        | Never                 | 7838 (81.4)   | 743 (69.9)  | Ref               | 0.01    |
|                         | >0–328                | 598 (6.2)     | 107 (10.1)  | 1.38 (1.09, 1.75) |         |
|                         | >328–1583             | 611 (6.3)     | 99 (9.3)    | 1.26 (0.98, 1.61) |         |
|                         | >1583                 | 587 (6.1)     | 114 (10.7)  | 1.46 (1.15, 1.85) |         |
| Heptachlor <sup>b</sup> | Never                 | 8490 (88.1)   | 872 (82.4)  | Ref               | 0.15    |
|                         | >0–289                | 394 (4.1)     | 55 (5.2)    | 1.01 (0.74, 1.37) |         |
|                         | >289–893              | 382 (4.0)     | 65 (6.1)    | 1.20 (0.90, 1.61) |         |
|                         | >893                  | 368 (3.8)     | 66 (6.2)    | 1.22 (0.91, 1.64) |         |
| Toxaphene <sup>b</sup>  | Never                 | 9247 (90.1)   | 977 (85.6)  | Ref               | 0.19    |
|                         | >0–298                | 340 (3.3)     | 51 (4.5)    | 1.24 (0.91, 1.68) |         |
|                         | >298–1050             | 335 (3.3)     | 65 (5.7)    | 1.57 (1.19, 2.08) |         |
|                         | >1050                 | 342 (3.3)     | 48 (4.2)    | 1.15 (0.84, 1.58) |         |
| Lindane <sup>b</sup>    | Never                 | 8730 (85.6)   | 890 (78.2)  | Ref               | <.0001  |
|                         | >0–315                | 509 (5.0)     | 81 (7.1)    | 1.40 (1.09, 1.79) |         |
|                         | >315–1176             | 493 (4.8)     | 77 (6.8)    | 1.41 (1.09, 1.82) |         |
|                         | >1176                 | 469 (4.6)     | 90 (7.9)    | 1.69 (1.32, 2.15) |         |
| Carbamate               |                       |               |             |                   |         |
| Aldicarb <sup>b</sup>   | Never                 | 9122 (93.2)   | 1022 (93.9) | Ref               | 0.14    |
|                         | >0–613                | 213 (2.2)     | 25 (2.3)    | 1.11 (0.72, 1.71) |         |
|                         | >613–2408             | 221 (2.3)     | 25 (2.3)    | 1.07 (0.69, 1.68) |         |
|                         | >2408                 | 227 (2.3)     | 16 (1.5)    | 0.66 (0.39, 1.14) |         |
| Carbaryl <sup>b</sup>   | Never                 | 5688 (58.9)   | 560 (52.1)  | Ref               | 0.60    |
|                         | >0–341                | 1340 (13.9)   | 172 (16.0)  | 1.19 (0.99, 1.43) |         |
|                         | >341–2015             | 1345 (13.9)   | 191 (17.8)  | 1.37 (1.13, 1.65) |         |
|                         | >2015                 | 1292 (13.4)   | 151 (14.1)  | 1.17 (0.93, 1.47) |         |
| Carbofuran              | Never                 | 12078 (71.5)  | 1203 (66.1) | Ref               | 0.31    |
|                         | >0–350                | 1591 (9.4)    | 225 (12.4)  | 1.28 (1.09, 1.49) |         |
|                         | >350–1260             | 1615 (9.6)    | 200 (11.0)  | 1.14 (0.97, 1.33) |         |
|                         | >1260                 | 1607 (9.5)    | 192 (10.5)  | 1.10 (0.93, 1.30) |         |
| Organophosphate         |                       |               |             |                   |         |
| Chlorpyrifos            | Never                 | 9399 (54.9)   | 959 (51.7)  | Ref               | 0.51    |
|                         | >0–435                | 2520 (14.7)   | 326 (17.6)  | 1.27 (1.11, 1.46) |         |
|                         | >435–1715             | 2646 (15.5)   | 290 (15.6)  | 1.08 (0.94, 1.24) |         |
|                         | >1715                 | 2554 (14.9)   | 280 (15.1)  | 1.07 (0.93, 1.24) |         |
| Coumaphos               | Never                 | 15153 (90.6)  | 1595 (89.1) | Ref               | 0.89    |

|                                                |           |              |             |                   |        |
|------------------------------------------------|-----------|--------------|-------------|-------------------|--------|
|                                                | >0-394    | 535 (3.2)    | 70 (3.9)    | 1.17 (0.90, 1.51) |        |
|                                                | >394-1369 | 507 (3.0)    | 70 (3.9)    | 1.25 (0.97, 1.62) |        |
|                                                | >1369     | 531 (3.2)    | 55 (3.1)    | 0.94 (0.71, 1.25) |        |
| Diazinon <sup>b</sup>                          | Never     | 7848 (79.4)  | 807 (72.7)  | Ref               | 0.004  |
|                                                | >0-515    | 693 (7.0)    | 110 (9.9)   | 1.44 (1.16, 1.80) |        |
|                                                | >515-3923 | 675 (6.8)    | 93 (8.4)    | 1.23 (0.97, 1.56) |        |
|                                                | >3923     | 664 (6.7)    | 100 (9.0)   | 1.42 (1.12, 1.80) |        |
| Dichlorvos                                     | Never     | 14885 (87.9) | 1533 (84.3) | Ref               | 0.04   |
|                                                | >0-315    | 688 (4.1)    | 89 (4.9)    | 1.18 (0.94, 1.49) |        |
|                                                | >315-1143 | 688 (4.1)    | 103 (5.7)   | 1.34 (1.08, 1.67) |        |
|                                                | >1143     | 677 (4.0)    | 93 (5.1)    | 1.24 (0.99, 1.55) |        |
| Fonofos                                        | Never     | 13085 (76.8) | 1375 (75.0) | Ref               | 0.61   |
|                                                | >0-429    | 1282 (7.5)   | 177 (9.7)   | 1.24 (1.04, 1.47) |        |
|                                                | >429-1550 | 1364 (8.0)   | 133 (7.3)   | 0.85 (0.70, 1.03) |        |
|                                                | >1550     | 1303 (7.6)   | 148 (8.1)   | 0.96 (0.80, 1.15) |        |
| Malathion <sup>b</sup>                         | Never     | 3541 (34.8)  | 315 (27.8)  | Ref               | 0.001  |
|                                                | >0-360    | 2207 (21.7)  | 262 (23.1)  | 1.28 (1.07, 1.52) |        |
|                                                | >360-1344 | 2273 (22.3)  | 262 (23.1)  | 1.21 (1.01, 1.45) |        |
|                                                | >1344     | 2157 (21.2)  | 296 (26.1)  | 1.40 (1.18, 1.67) |        |
| Parathion <sup>b</sup>                         | Never     | 9491 (93.1)  | 1022 (90.4) | Ref               | 0.07   |
|                                                | >0-315    | 232 (2.3)    | 38 (3.4)    | 1.41 (0.99, 2.01) |        |
|                                                | >315-1700 | 238 (2.3)    | 37 (3.3)    | 1.39 (0.97, 2.00) |        |
|                                                | >1700     | 236 (2.3)    | 34 (3.0)    | 1.31 (0.90, 1.90) |        |
| Phorate <sup>b</sup>                           | Never     | 6643 (67.8)  | 693 (63.8)  | Ref               | 0.81   |
|                                                | >0-315    | 1078 (11.0)  | 140 (12.9)  | 1.11 (0.91, 1.36) |        |
|                                                | >315-1117 | 1028 (10.5)  | 134 (12.3)  | 1.15 (0.94, 1.41) |        |
|                                                | >1117     | 1053 (10.7)  | 120 (11.0)  | 0.95 (0.77, 1.17) |        |
| Terbufos                                       | Never     | 10080 (59.3) | 1041 (56.8) | Ref               | 0.04   |
|                                                | >0-621    | 2293 (13.5)  | 261 (14.2)  | 1.07 (0.93, 1.25) |        |
|                                                | >621-2279 | 2371 (13.9)  | 251 (13.7)  | 0.99 (0.85, 1.15) |        |
|                                                | >2279     | 2264 (13.3)  | 281 (15.3)  | 1.15 (0.99, 1.32) |        |
| Permethrin                                     |           |              |             |                   |        |
| Permethrin (crops)                             | Never     | 14601 (86.7) | 1523 (84.7) | Ref               | 0.0006 |
|                                                | >0-245    | 742 (4.4)    | 90 (5.0)    | 1.16 (0.93, 1.46) |        |
|                                                | >245-963  | 778 (4.6)    | 82 (4.6)    | 1.06 (0.84, 1.35) |        |
|                                                | >963      | 725 (4.3)    | 104 (5.8)   | 1.47 (1.18, 1.82) |        |
| Permethrin (animals)                           | Never     | 14491 (84.9) | 1507 (82.3) | Ref               | 0.36   |
|                                                | >0-350    | 838 (4.9)    | 121 (6.6)   | 1.44 (1.18, 1.77) |        |
|                                                | >350-1382 | 880 (5.2)    | 108 (5.9)   | 1.22 (0.98, 1.50) |        |
|                                                | >1382     | 861 (5.0)    | 96 (5.2)    | 1.11 (0.89, 1.38) |        |
| Fumigant                                       |           |              |             |                   |        |
| CCl <sub>4</sub> /CS <sub>2</sub> <sup>b</sup> | Never     | 9891 (96.3)  | 1067 (93.3) | Ref               | 0.04   |
|                                                | >0-63     | 126 (1.2)    | 25 (2.2)    | 1.48 (0.96, 2.30) |        |
|                                                | >63-331   | 135 (1.3)    | 25 (2.2)    | 1.28 (0.83, 1.99) |        |
|                                                | >331      | 124 (1.2)    | 27 (2.4)    | 1.53 (0.99, 2.35) |        |
| Aluminum phosphide <sup>b</sup>                | Never     | 9904 (96.3)  | 1101 (95.7) | Ref               | 0.91   |
|                                                | >0-56     | 124 (1.2)    | 18 (1.6)    | 1.27 (0.77, 2.10) |        |
|                                                | >56-248   | 127 (1.2)    | 18 (1.6)    | 1.25 (0.76, 2.07) |        |
|                                                | >248      | 128 (1.2)    | 13 (1.1)    | 0.92 (0.51, 1.64) |        |
| Ethylene dibromide <sup>b</sup>                | Never     | 9877 (96)    | 1101 (95.5) | Ref               | 0.41   |
|                                                | >0-196    | 137 (1.3)    | 16 (1.4)    | 1.09 (0.64, 1.85) |        |

|                                |           |              |             |                   |       |
|--------------------------------|-----------|--------------|-------------|-------------------|-------|
|                                | >196–919  | 136 (1.3)    | 18 (1.6)    | 1.26 (0.76, 2.09) |       |
|                                | >919      | 135 (1.3)    | 18 (1.6)    | 1.21 (0.72, 2.02) |       |
| Methyl bromide                 | Never     | 14670 (86.6) | 1574 (86.8) | Ref               | 0.71  |
|                                | >0–294    | 738 (4.4)    | 74 (4.1)    | 0.97 (0.75, 1.27) |       |
|                                | >294–1260 | 775 (4.6)    | 86 (4.7)    | 1.06 (0.82, 1.38) |       |
|                                | >1260     | 765 (4.5)    | 79 (4.4)    | 0.95 (0.72, 1.25) |       |
| Fungicide                      |           |              |             |                   |       |
| Benomyl <sup>b</sup>           | Never     | 8866 (93.5)  | 967 (92.2)  | Ref               | 0.13  |
|                                | >0–343    | 198 (2.1)    | 34 (3.2)    | 1.68 (1.13, 2.49) |       |
|                                | >343–1773 | 220 (2.3)    | 19 (1.8)    | 0.89 (0.53, 1.49) |       |
|                                | >1773     | 194 (2.0)    | 29 (2.8)    | 1.51 (0.96, 2.37) |       |
| Captan                         | Never     | 14849 (89.3) | 1547 (86.7) | Ref               | 0.07  |
|                                | >0–9      | 664 (4.0)    | 85 (4.8)    | 1.23 (0.97, 1.55) |       |
|                                | >9–161    | 527 (3.2)    | 74 (4.1)    | 1.31 (1.02, 1.69) |       |
|                                | >161      | 579 (3.5)    | 79 (4.4)    | 1.28 (1.00, 1.64) |       |
| Chlorothalonil                 | Never     | 15833 (93.6) | 1680 (93.2) | Ref               | 0.94  |
|                                | >0–539    | 344 (2.0)    | 45 (2.5)    | 1.28 (0.92, 1.78) |       |
|                                | >539–3080 | 358 (2.1)    | 42 (2.3)    | 1.20 (0.85, 1.71) |       |
|                                | >3080     | 372 (2.2)    | 35 (1.9)    | 1.00 (0.68, 1.47) |       |
| Maneb/Mancozeb <sup>b</sup>    | Never     | 9078 (93.1)  | 1012 (93.2) | Ref               | 0.79  |
|                                | >0–425    | 232 (2.4)    | 22 (2.0)    | 0.85 (0.54, 1.35) |       |
|                                | >425–2688 | 230 (2.4)    | 25 (2.3)    | 0.93 (0.59, 1.46) |       |
|                                | >2688     | 215 (2.2)    | 27 (2.5)    | 1.05 (0.68, 1.62) |       |
| Metalaxyl <sup>b</sup>         | Never     | 8370 (82.7)  | 926 (82.1)  | Ref               | 0.07  |
|                                | >0–239    | 576 (5.7)    | 66 (5.9)    | 1.03 (0.79, 1.35) |       |
|                                | >239–1323 | 596 (5.9)    | 63 (5.6)    | 1.10 (0.82, 1.49) |       |
|                                | >1323     | 576 (5.7)    | 73 (6.5)    | 1.35 (0.99, 1.84) |       |
| Herbicide                      |           |              |             |                   |       |
| Alachlor                       | Never     | 7592 (44.9)  | 755 (41.4)  | Ref               | 0.06  |
|                                | >0–788    | 3114 (18.4)  | 332 (18.2)  | 1.00 (0.87, 1.15) |       |
|                                | >788–2958 | 3140 (18.6)  | 371 (20.4)  | 1.11 (0.97, 1.27) |       |
|                                | >2958     | 3056 (18.1)  | 364 (20)    | 1.11 (0.97, 1.27) |       |
| Butylate <sup>b</sup>          | Never     | 6940 (71.1)  | 726 (66.9)  | Ref               | 0.02  |
|                                | >0–455    | 943 (9.7)    | 119 (11)    | 1.12 (0.90, 1.38) |       |
|                                | >455–1512 | 969 (9.9)    | 111 (10.2)  | 1.00 (0.80, 1.25) |       |
|                                | >1512     | 908 (9.3)    | 130 (12.0)  | 1.26 (1.02, 1.55) |       |
| Chlorimuron ethyl <sup>b</sup> | Never     | 6976 (68.0)  | 768 (67.0)  | Ref               | 0.31  |
|                                | >0–236    | 1124 (11.0)  | 133 (11.6)  | 1.11 (0.91, 1.35) |       |
|                                | >236–662  | 1071 (10.4)  | 122 (10.6)  | 1.04 (0.84, 1.27) |       |
|                                | >662      | 1084 (10.6)  | 124 (10.8)  | 1.09 (0.88, 1.33) |       |
| Dicamba                        | Never     | 7653 (45.2)  | 750 (41.3)  | Ref               | 0.72  |
|                                | >0–551    | 3064 (18.1)  | 357 (19.6)  | 1.15 (1.00, 1.33) |       |
|                                | >551–2170 | 3151 (18.6)  | 373 (20.5)  | 1.14 (0.99, 1.32) |       |
|                                | >2170     | 3050 (18.0)  | 337 (18.5)  | 1.07 (0.92, 1.24) |       |
| EPTC                           | Never     | 13280 (78.8) | 1391 (76.9) | Ref               | 0.14  |
|                                | >0–315    | 1209 (7.2)   | 129 (7.1)   | 0.97 (0.80, 1.18) |       |
|                                | >315–1176 | 1216 (7.2)   | 152 (8.4)   | 1.14 (0.95, 1.36) |       |
|                                | >1176     | 1143 (6.8)   | 137 (7.6)   | 1.09 (0.90, 1.31) |       |
| Glyphosate                     | Never     | 4144 (23.1)  | 352 (18.3)  | Ref               | 0.001 |
|                                | >0–672    | 4559 (25.4)  | 541 (28.1)  | 1.42 (1.23, 1.64) |       |
|                                | >672–2610 | 4724 (26.3)  | 491 (25.5)  | 1.24 (1.07, 1.44) |       |



|                                    |            |             |            |                   |      |
|------------------------------------|------------|-------------|------------|-------------------|------|
| Imazethapyr                        | >2610      | 4548 (25.3) | 539 (28.0) | 1.45 (1.25, 1.68) | 0.89 |
|                                    | Never      | 8889 (53.5) | 936 (52.7) | Ref               |      |
|                                    | >0–338     | 2540 (15.3) | 290 (16.3) | 0.99 (0.85, 1.16) |      |
|                                    | >338–992   | 2664 (16)   | 274 (15.4) | 0.90 (0.77, 1.05) |      |
| Metolachlor                        | >992       | 2507 (15.1) | 277 (15.6) | 0.97 (0.83, 1.14) | 0.13 |
|                                    | Never      | 8866 (52.2) | 922 (50.2) | Ref               |      |
|                                    | >0–720     | 2701 (15.9) | 351 (19.1) | 1.23 (1.07, 1.40) |      |
|                                    | >720–2604  | 2744 (16.2) | 302 (16.4) | 1.02 (0.89, 1.18) |      |
| Paraquat <sup>b</sup>              | >2604      | 2678 (15.8) | 261 (14.2) | 0.91 (0.78, 1.05) | 0.03 |
|                                    | Never      | 8765 (85.4) | 949 (83.0) | Ref               |      |
|                                    | >0–275     | 500 (4.9)   | 64 (5.6)   | 1.18 (0.90, 1.56) |      |
|                                    | >275–1080  | 505 (4.9)   | 68 (5.9)   | 1.31 (1.00, 1.73) |      |
| Pendimethalin <sup>b</sup>         | >1080      | 492 (4.8)   | 63 (5.5)   | 1.33 (0.99, 1.79) | 0.33 |
|                                    | Never      | 6478 (63.2) | 697 (60.7) | Ref               |      |
|                                    | >0–315     | 1276 (12.4) | 146 (12.7) | 1.03 (0.85, 1.25) |      |
|                                    | >315–1176  | 1242 (12.1) | 170 (14.8) | 1.30 (1.09, 1.56) |      |
| Petroleum distillates <sup>b</sup> | >1176      | 1259 (12.3) | 135 (11.8) | 1.04 (0.86, 1.27) | 0.01 |
|                                    | Never      | 8018 (78.7) | 844 (73.6) | Ref               |      |
|                                    | >0–502     | 731 (7.2)   | 96 (8.4)   | 1.22 (0.97, 1.53) |      |
|                                    | >502–2438  | 726 (7.1)   | 107 (9.3)  | 1.39 (1.12, 1.73) |      |
| Trifluralin                        | >2438      | 708 (7.0)   | 99 (8.6)   | 1.29 (1.03, 1.62) | 0.05 |
|                                    | Never      | 7267 (45.1) | 697 (40.4) | Ref               |      |
|                                    | >0–1020    | 2948 (18.3) | 312 (18.1) | 1.04 (0.89, 1.21) |      |
|                                    | >1020–3875 | 3019 (18.7) | 360 (20.8) | 1.14 (0.98, 1.32) |      |
| 2,4-D                              | >3875      | 2878 (17.9) | 358 (20.7) | 1.15 (0.98, 1.34) | 0.01 |
|                                    | Never      | 3981 (22.3) | 346 (18.1) | Ref               |      |
|                                    | >0–1302    | 4620 (25.9) | 489 (25.6) | 1.14 (0.98, 1.33) |      |
|                                    | >1302–5208 | 4836 (27.1) | 512 (26.8) | 1.08 (0.93, 1.26) |      |
| 2,4,5-T <sup>b</sup>               | >5208      | 4431 (24.8) | 563 (29.5) | 1.21 (1.04, 1.41) | 0.01 |
|                                    | Never      | 7960 (82.2) | 772 (71.7) | Ref               |      |
|                                    | >0–280     | 562 (5.8)   | 105 (9.8)  | 1.64 (1.30, 2.06) |      |
|                                    | >280–971   | 583 (6.0)   | 108 (10.0) | 1.66 (1.32, 2.09) |      |
| 2,4,5-TP <sup>b</sup>              | >971       | 573 (5.9)   | 91 (8.5)   | 1.40 (1.10, 1.80) | 0.22 |
|                                    | Never      | 9239 (95.3) | 998 (92.5) | Ref               |      |
|                                    | >0–315     | 158 (1.6)   | 25 (2.3)   | 1.20 (0.77, 1.86) |      |
|                                    | >315–1250  | 148 (1.5)   | 32 (3.0)   | 1.61 (1.08, 2.41) |      |
| Atrazine                           | >1250      | 148 (1.5)   | 24 (2.2)   | 1.19 (0.76, 1.86) | 0.26 |
|                                    | Never      | 4831 (26.8) | 447 (23.3) | Ref               |      |
|                                    | >0–1054    | 4369 (24.3) | 484 (25.2) | 1.14 (0.99, 1.31) |      |
|                                    | >1054–4340 | 4497 (25.0) | 491 (25.6) | 1.08 (0.93, 1.25) |      |
| Cyanazine                          | >4340      | 4299 (23.9) | 495 (25.8) | 1.10 (0.96, 1.28) | 0.15 |
|                                    | Never      | 9433 (55.5) | 952 (52.0) | Ref               |      |
|                                    | >0–539     | 2496 (14.7) | 299 (16.3) | 1.11 (0.96, 1.28) |      |
|                                    | >539–2200  | 2581 (15.2) | 283 (15.4) | 1.00 (0.86, 1.16) |      |
| Metribuzin <sup>b</sup>            | >2200      | 2475 (14.6) | 298 (16.3) | 1.10 (0.95, 1.27) | 0.01 |
|                                    | Never      | 5525 (58.3) | 560 (53.3) | Ref               |      |
|                                    | >0–315     | 1317 (13.9) | 145 (13.8) | 0.99 (0.80, 1.22) |      |
|                                    | >315–1000  | 1353 (14.3) | 162 (15.4) | 1.08 (0.89, 1.33) |      |
|                                    | >1000      | 1277 (13.5) | 183 (17.4) | 1.26 (1.04, 1.54) |      |

Abbreviation: 2,4-D, 2,4-Dichlorophenoxyacetic acid; 2,4,5-T, 2,4,5-Trichlorophenoxyacetic acid; 2,4,5-T,P, 2-(2,4,5-trichlorophenoxy) propionic acid; CI, Confidence Intervals; CCl<sub>4</sub>/CS<sub>2</sub>, Carbon tetrachloride/Carbon disulfide 80/20

mix; DDT, Dichlorodiphenyltrichloroethane; EPTC, S-Ethyl dipropylthiocarbamate; OI, Olfactory Impairment; OR, Odds Ratio

Odds ratios are adjusted for age, sex, state of residence, education, smoking status, ever performed following tasks at least once each year (repair engines, replace asbestos brake linings, handle stored grain, work in swine confinement areas, weld and paint), and correlated pesticides (correlated ever-use of pesticides with Spearman correlation  $\geq 0.40$ )

<sup>a</sup>Exposure categories: Never-use and categorized into tertiles among users

<sup>b</sup>Frequency and duration of pesticide was asked only in the take-home questionnaire

Supplementary table 5: Lifetime days (unweighted) of use at enrollment in relation to self-reported olfactory impairment in the Agricultural Health Study

| Pesticides   | Days      | No OI, n (%) | OI, n (%)   | OR (95% CI)       | P      |
|--------------|-----------|--------------|-------------|-------------------|--------|
| Aldrin       | Never use | 8080 (83.9)  | 849 (75.7)  | Ref               | 0.17   |
|              | Tertile 1 | 752 (7.8)    | 122 (10.9)  | 1.06 (0.84, 1.32) |        |
|              | Tertile 2 | 460 (4.8)    | 78 (7.0)    | 1.06 (0.80, 1.40) |        |
|              | Tertile 3 | 344 (3.6)    | 72 (6.4)    | 1.24 (0.92, 1.67) |        |
| Chlordane    | Never use | 8080 (82.0)  | 857 (73.1)  | Ref               | 0.003  |
|              | Tertile 1 | 480 (4.9)    | 83 (7.1)    | 1.43 (1.11, 1.84) |        |
|              | Tertile 2 | 726 (7.4)    | 119 (10.2)  | 1.23 (0.99, 1.52) |        |
|              | Tertile 3 | 568 (5.8)    | 113 (9.6)   | 1.40 (1.12, 1.75) |        |
| Dieldrin     | Never use | 9363 (96.7)  | 1074 (94.5) |                   | 0.96   |
|              | Tertile 1 | 80 (0.8)     | 13 (1.1)    | 0.91 (0.50, 1.67) |        |
|              | Tertile 2 | 133 (1.4)    | 32 (2.8)    | 1.26 (0.84, 1.90) |        |
|              | Tertile 3 | 106 (1.1)    | 17 (1.5)    | 0.89 (0.52, 1.50) |        |
| DDT          | Never use | 7873 (81.2)  | 794 (69.4)  | Ref               | 0.04   |
|              | Tertile 1 | 848 (8.8)    | 159 (13.9)  | 1.33 (1.08, 1.63) |        |
|              | Tertile 2 | 380 (3.9)    | 72 (6.3)    | 1.31 (0.99, 1.74) |        |
|              | Tertile 3 | 589 (6.1)    | 119 (10.4)  | 1.34 (1.06, 1.69) |        |
| Heptachlor   | Never use | 8535 (88.1)  | 938 (82.4)  | Ref               | 0.10   |
|              | Tertile 1 | 590 (6.1)    | 96 (8.4)    | 1.06 (0.83, 1.36) |        |
|              | Tertile 2 | 325 (3.4)    | 50 (4.4)    | 0.96 (0.70, 1.33) |        |
|              | Tertile 3 | 241 (2.5)    | 54 (4.7)    | 1.37 (0.99, 1.89) |        |
| Toxaphene    | Never use | 9303 (90.1)  | 1050 (85.7) | Ref               | 0.05   |
|              | Tertile 1 | 538 (5.2)    | 88 (7.2)    | 1.25 (0.99, 1.59) |        |
|              | Tertile 2 | 234 (2.3)    | 43 (3.5)    | 1.35 (0.96, 1.89) |        |
|              | Tertile 3 | 251 (2.4)    | 44 (3.6)    | 1.32 (0.95, 1.85) |        |
| Lindane      | Never use | 8777 (85.5)  | 957 (78.4)  | Ref               | <.0001 |
|              | Tertile 1 | 696 (6.8)    | 118 (9.7)   | 1.38 (1.12, 1.71) |        |
|              | Tertile 2 | 330 (3.2)    | 46 (3.8)    | 1.14 (0.83, 1.58) |        |
|              | Tertile 3 | 460 (4.5)    | 99 (8.1)    | 1.78 (1.41, 2.25) |        |
| Aldicarb     | Never use | 9177 (93.3)  | 1099 (94.3) | Ref               | 0.02   |
|              | Tertile 1 | 217 (2.2)    | 23 (2.0)    | 0.94 (0.60, 1.48) |        |
|              | Tertile 2 | 267 (2.7)    | 35 (3.0)    | 1.21 (0.82, 1.78) |        |
|              | Tertile 3 | 179 (1.8)    | 9 (0.8)     | 0.43 (0.21, 0.86) |        |
| Carbaryl     | Never use | 5720 (58.8)  | 605 (52.4)  | Ref               | 0.33   |
|              | Tertile 1 | 1731 (17.8)  | 253 (21.9)  | 1.26 (1.07, 1.48) |        |
|              | Tertile 2 | 998 (10.3)   | 130 (11.3)  | 1.13 (0.91, 1.41) |        |
|              | Tertile 3 | 1272 (13.1)  | 167 (14.5)  | 1.18 (0.95, 1.48) |        |
| Carbofuran   | Never use | 12143 (71.4) | 1278 (65.9) | Ref               | 0.07   |
|              | Tertile 1 | 1976 (11.6)  | 272 (14.0)  | 1.18 (1.02, 1.35) |        |
|              | Tertile 2 | 1279 (7.5)   | 182 (9.4)   | 1.21 (1.02, 1.43) |        |
|              | Tertile 3 | 1600 (9.4)   | 206 (10.6)  | 1.12 (0.95, 1.31) |        |
| Chlorpyrifos | Never use | 10324 (57.1) | 1094 (53.6) | Ref               | 0.06   |
|              | Tertile 1 | 2614 (14.4)  | 338 (16.6)  | 1.22 (1.07, 1.39) |        |
|              | Tertile 2 | 2678 (14.8)  | 303 (14.8)  | 1.05 (0.92, 1.21) |        |
|              | Tertile 3 | 2475 (13.7)  | 307 (15.0)  | 1.17 (1.02, 1.34) |        |
| Coumaphos    | Never use | 15237 (90.6) | 1694 (88.8) | Ref               | 0.67   |
|              | Tertile 1 | 671 (4.0)    | 100 (5.2)   | 1.25 (1.00, 1.55) |        |
|              | Tertile 2 | 447 (2.7)    | 65 (3.4)    | 1.24 (0.95, 1.62) |        |
|              | Tertile 3 | 468 (2.8)    | 48 (2.5)    | 0.88 (0.65, 1.19) |        |

|                                   |           |              |             |                   |      |
|-----------------------------------|-----------|--------------|-------------|-------------------|------|
| Diazinon                          | Never use | 7891 (79.4)  | 866 (72.9)  | Ref               | 0.00 |
|                                   | Tertile 1 | 1026 (10.3)  | 153 (12.9)  | 1.29 (1.07, 1.56) |      |
|                                   | Tertile 2 | 445 (4.5)    | 77 (6.5)    | 1.39 (1.07, 1.80) |      |
|                                   | Tertile 3 | 574 (5.8)    | 92 (7.7)    | 1.45 (1.14, 1.86) |      |
| DDVP                              | Never use | 14963 (87.8) | 1631 (84.3) | Ref               | 0.03 |
|                                   | Tertile 1 | 816 (4.8)    | 108 (5.6)   | 1.12 (0.91, 1.39) |      |
|                                   | Tertile 2 | 679 (4.0)    | 106 (5.5)   | 1.32 (1.06, 1.63) |      |
|                                   | Tertile 3 | 581 (3.4)    | 89 (4.6)    | 1.28 (1.01, 1.61) |      |
| Fonofos                           | Never use | 13161 (76.8) | 1462 (75.0) | Ref               | 0.37 |
|                                   | Tertile 1 | 1638 (9.6)   | 208 (10.7)  | 1.06 (0.90, 1.24) |      |
|                                   | Tertile 2 | 1137 (6.6)   | 139 (7.1)   | 0.99 (0.82, 1.20) |      |
|                                   | Tertile 3 | 1200 (7.0)   | 141 (7.2)   | 0.92 (0.76, 1.11) |      |
| Malathion                         | Never use | 3562 (34.8)  | 345 (28.3)  | Ref               | 0.01 |
|                                   | Tertile 1 | 2732 (26.7)  | 331 (27.2)  | 1.18 (1.01, 1.39) |      |
|                                   | Tertile 2 | 2165 (21.1)  | 284 (23.3)  | 1.25 (1.05, 1.48) |      |
|                                   | Tertile 3 | 1784 (17.4)  | 258 (21.2)  | 1.34 (1.12, 1.60) |      |
| Parathion                         | Never use | 9549 (93.1)  | 1099 (90.5) | Ref               | 0.49 |
|                                   | Tertile 1 | 309 (3.0)    | 59 (4.9)    | 1.53 (1.14, 2.05) |      |
|                                   | Tertile 2 | 173 (1.7)    | 27 (2.2)    | 1.32 (0.86, 2.00) |      |
|                                   | Tertile 3 | 227 (2.2)    | 29 (2.4)    | 1.09 (0.73, 1.62) |      |
| Phorate                           | Never use | 6682 (67.8)  | 741 (63.6)  | Ref               | 0.90 |
|                                   | Tertile 1 | 1334 (13.5)  | 180 (15.4)  | 1.08 (0.90, 1.29) |      |
|                                   | Tertile 2 | 869 (8.8)    | 126 (10.8)  | 1.16 (0.94, 1.43) |      |
|                                   | Tertile 3 | 974 (9.9)    | 119 (10.2)  | 0.95 (0.77, 1.17) |      |
| Terbufos                          | Never use | 10144 (59.3) | 1100 (56.4) | Ref               | 0.09 |
|                                   | Tertile 1 | 2519 (14.7)  | 295 (15.1)  | 1.04 (0.91, 1.2)  |      |
|                                   | Tertile 2 | 2418 (14.1)  | 290 (14.9)  | 1.07 (0.93, 1.23) |      |
|                                   | Tertile 3 | 2034 (11.9)  | 265 (13.6)  | 1.14 (0.98, 1.32) |      |
| Permethrin (crops)                | Never use | 14691 (86.7) | 1626 (84.9) | Ref               | 0.02 |
|                                   | Tertile 1 | 1199 (7.1)   | 153 (8.0)   | 1.17 (0.98, 1.39) |      |
|                                   | Tertile 2 | 410 (2.4)    | 52 (2.7)    | 1.24 (0.92, 1.67) |      |
|                                   | Tertile 3 | 642 (3.8)    | 84 (4.4)    | 1.3 (1.02, 1.65)  |      |
| Permethrin (animals)              | Never use | 14569 (84.8) | 1611 (82.7) | Ref               | 0.28 |
|                                   | Tertile 1 | 1078 (6.3)   | 157 (8.1)   | 1.35 (1.13, 1.62) |      |
|                                   | Tertile 2 | 685 (4.0)    | 79 (4.1)    | 1.08 (0.85, 1.38) |      |
|                                   | Tertile 3 | 844 (4.9)    | 101 (5.2)   | 1.13 (0.91, 1.40) |      |
| CCl <sub>4</sub> /CS <sub>2</sub> | Never use | 9947 (96.2)  | 1146 (93.2) | Ref               | 0.13 |
|                                   | Tertile 1 | 188 (1.8)    | 39 (3.2)    | 1.40 (0.98, 2.00) |      |
|                                   | Tertile 2 | 97 (0.9)     | 21 (1.7)    | 1.36 (0.84, 2.21) |      |
|                                   | Tertile 3 | 111 (1.1)    | 23 (1.9)    | 1.34 (0.84, 2.12) |      |
| Aluminum Phosphide                | Never use | 9963 (96.2)  | 1181 (95.8) | Ref               | 0.81 |
|                                   | Tertile 1 | 211 (2.0)    | 32 (2.6)    | 1.22 (0.83, 1.78) |      |
|                                   | Tertile 2 | 108 (1.0)    | 11 (0.9)    | 0.88 (0.47, 1.65) |      |
|                                   | Tertile 3 | 70 (0.7)     | 9 (0.7)     | 1.10 (0.54, 2.22) |      |
| Ethylene Dibromide                | Never use | 9937 (96.0)  | 1182 (95.6) | Ref               | 0.90 |
|                                   | Tertile 1 | 151 (1.5)    | 18 (1.5)    | 1.06 (0.64, 1.75) |      |
|                                   | Tertile 2 | 156 (1.5)    | 28 (2.3)    | 1.55 (1.01, 2.36) |      |
|                                   | Tertile 3 | 104 (1.0)    | 9 (0.7)     | 0.76 (0.38, 1.52) |      |
| Methyl Bromide                    | Never use | 14752 (86.5) | 1673 (86.9) | Ref               | 0.17 |
|                                   | Tertile 1 | 895 (5.2)    | 89 (4.6)    | 0.95 (0.74, 1.21) |      |
|                                   | Tertile 2 | 676 (4.0)    | 66 (3.4)    | 0.87 (0.65, 1.17) |      |

|                   |           |              |             |                   |      |
|-------------------|-----------|--------------|-------------|-------------------|------|
| Benomyl           | Tertile 3 | 732 (4.3)    | 98 (5.1)    | 1.18 (0.92, 1.53) | 0.20 |
|                   | Never use | 8920 (93.5)  | 1041 (92.3) | Ref               |      |
|                   | Tertile 1 | 302 (3.2)    | 42 (3.7)    | 1.32 (0.93, 1.89) |      |
|                   | Tertile 2 | 116 (1.2)    | 16 (1.4)    | 1.34 (0.76, 2.35) |      |
| Captan            | Tertile 3 | 199 (2.1)    | 29 (2.6)    | 1.41 (0.90, 2.23) | 0.04 |
|                   | Never use | 14939 (89.3) | 1649 (86.8) | Ref               |      |
|                   | Tertile 1 | 1080 (6.5)   | 150 (7.9)   | 1.24 (1.03, 1.48) |      |
|                   | Tertile 2 | 137 (0.8)    | 17 (0.9)    | 1.08 (0.65, 1.79) |      |
| Chlorothalonil    | Tertile 3 | 566 (3.4)    | 83 (4.4)    | 1.31 (1.03, 1.67) | 0.92 |
|                   | Never use | 15927 (93.6) | 1791 (93.4) | Ref               |      |
|                   | Tertile 1 | 365 (2.1)    | 50 (2.6)    | 1.27 (0.93, 1.74) |      |
|                   | Tertile 2 | 339 (2.0)    | 39 (2.0)    | 1.13 (0.79, 1.63) |      |
| Maneb/Mancozeb    | Tertile 3 | 378 (2.2)    | 38 (2.0)    | 1.03 (0.71, 1.49) | 0.89 |
|                   | Never use | 9138 (93.1)  | 1089 (93.2) | Ref               |      |
|                   | Tertile 1 | 310 (3.2)    | 27 (2.3)    | 0.73 (0.48, 1.11) |      |
|                   | Tertile 2 | 191 (1.9)    | 33 (2.8)    | 1.41 (0.94, 2.12) |      |
| Metalaxyl         | Tertile 3 | 179 (1.8)    | 20 (1.7)    | 0.89 (0.54, 1.45) | 0.05 |
|                   | Never use | 8441 (82.8)  | 996 (82.1)  | Ref               |      |
|                   | Tertile 1 | 630 (6.2)    | 79 (6.5)    | 1.08 (0.84, 1.39) |      |
|                   | Tertile 2 | 683 (6.7)    | 79 (6.5)    | 1.12 (0.85, 1.47) |      |
| Alachlor          | Tertile 3 | 442 (4.3)    | 59 (4.9)    | 1.40 (1.01, 1.94) | 0.01 |
|                   | Never use | 7642 (44.9)  | 795 (41.0)  | Ref               |      |
|                   | Tertile 1 | 4219 (24.8)  | 484 (25.0)  | 1.02 (0.91, 1.16) |      |
|                   | Tertile 2 | 2097 (12.3)  | 249 (12.8)  | 1.05 (0.90, 1.23) |      |
| Butylate          | Tertile 3 | 3051 (17.9)  | 411 (21.2)  | 1.18 (1.04, 1.35) | 0.10 |
|                   | Never use | 6975 (71.1)  | 790 (67.8)  | Ref               |      |
|                   | Tertile 1 | 982 (10.0)   | 132 (11.3)  | 1.08 (0.88, 1.33) |      |
|                   | Tertile 2 | 1085 (11.1)  | 125 (10.7)  | 0.94 (0.77, 1.16) |      |
| Chlorimuron Ethyl | Tertile 3 | 773 (7.9)    | 119 (10.2)  | 1.22 (0.98, 1.51) | 0.43 |
|                   | Never use | 7021 (68.0)  | 828 (67.3)  | Ref               |      |
|                   | Tertile 1 | 2147 (20.8)  | 265 (21.5)  | 1.07 (0.92, 1.24) |      |
|                   | Tertile 2 | 117 (1.1)    | 11 (0.9)    | 0.73 (0.39, 1.36) |      |
| Dicamba           | Tertile 3 | 1033 (10.0)  | 126 (10.2)  | 1.10 (0.90, 1.35) | 0.43 |
|                   | Never use | 7708 (45.2)  | 794 (41.0)  | Ref               |      |
|                   | Tertile 1 | 3972 (23.3)  | 501 (25.9)  | 1.16 (1.02, 1.33) |      |
|                   | Tertile 2 | 2796 (16.4)  | 322 (16.6)  | 1.07 (0.92, 1.24) |      |
| EPTC              | Tertile 3 | 2560 (15.0)  | 318 (16.4)  | 1.13 (0.97, 1.31) | 0.13 |
|                   | Never use | 13365 (78.9) | 1488 (77.3) | Ref               |      |
|                   | Tertile 1 | 1662 (9.8)   | 191 (9.9)   | 0.97 (0.82, 1.14) |      |
|                   | Tertile 2 | 822 (4.9)    | 97 (5.0)    | 1.01 (0.81, 1.26) |      |
| Glyphosate        | Tertile 3 | 1096 (6.5)   | 148 (7.7)   | 1.15 (0.96, 1.38) | 0.00 |
|                   | Never use | 4166 (23.0)  | 381 (18.6)  | Ref               |      |
|                   | Tertile 1 | 5728 (31.6)  | 680 (33.2)  | 1.31 (1.15, 1.50) |      |
|                   | Tertile 2 | 4176 (23.1)  | 472 (23.1)  | 1.28 (1.11, 1.48) |      |
| Imazethapyr       | Tertile 3 | 4031 (22.3)  | 513 (25.1)  | 1.44 (1.24, 1.66) | 0.27 |
|                   | Never use | 8947 (53.6)  | 1001 (52.9) | Ref               |      |
|                   | Tertile 1 | 3400 (20.4)  | 416 (22.0)  | 1.00 (0.87, 1.14) |      |
|                   | Tertile 2 | 2510 (15.0)  | 268 (14.2)  | 0.88 (0.75, 1.03) |      |
| Metolachlor       | Tertile 3 | 1841 (11.0)  | 207 (10.9)  | 0.94 (0.79, 1.12) | 0.20 |
|                   | Never use | 8929 (52.2)  | 989 (50.6)  | Ref               |      |
|                   | Tertile 1 | 2730 (16.0)  | 376 (19.3)  | 1.20 (1.06, 1.37) |      |

|               |           |             |             |                   |      |
|---------------|-----------|-------------|-------------|-------------------|------|
|               | Tertile 2 | 2908 (17.0) | 305 (15.6)  | 0.92 (0.80, 1.05) |      |
|               | Tertile 3 | 2530 (14.8) | 283 (14.5)  | 0.96 (0.84, 1.11) |      |
| Paraquat      | Never use | 8817 (85.4) | 1022 (83.2) | Ref               | 0.05 |
|               | Tertile 1 | 838 (8.1)   | 121 (9.9)   | 1.25 (1.02, 1.54) |      |
|               | Tertile 2 | 274 (2.7)   | 29 (2.4)    | 0.99 (0.66, 1.48) |      |
|               | Tertile 3 | 394 (3.8)   | 56 (4.6)    | 1.39 (1.01, 1.90) |      |
| Pendimethalin | Never use | 6521 (63.2) | 755 (61.3)  | Ref               | 0.62 |
|               | Tertile 1 | 1698 (16.5) | 229 (18.6)  | 1.13 (0.97, 1.33) |      |
|               | Tertile 2 | 967 (9.4)   | 122 (9.9)   | 1.14 (0.93, 1.40) |      |
|               | Tertile 3 | 1132 (11.0) | 126 (10.2)  | 1.02 (0.83, 1.25) |      |
| Petroleum     | Never use | 8058 (78.7) | 911 (74.1)  | Ref               | 0.04 |
|               | Tertile 1 | 732 (7.1)   | 102 (8.3)   | 1.21 (0.97, 1.51) |      |
|               | Tertile 2 | 812 (7.9)   | 120 (9.8)   | 1.30 (1.06, 1.60) |      |
|               | Tertile 3 | 642 (6.3)   | 96 (7.8)    | 1.27 (1.01, 1.60) |      |
| Trifluralin   | Never use | 7301 (45.0) | 742 (40.5)  | Ref               | 0.16 |
|               | Tertile 1 | 3029 (18.7) | 343 (18.7)  | 1.05 (0.90, 1.21) |      |
|               | Tertile 2 | 3540 (21.8) | 440 (24.0)  | 1.09 (0.95, 1.27) |      |
|               | Tertile 3 | 2339 (14.4) | 309 (16.8)  | 1.14 (0.97, 1.34) |      |
| 2,4-D         | Never use | 4004 (22.3) | 364 (17.9)  | Ref               | 0.19 |
|               | Tertile 1 | 5538 (30.8) | 606 (29.8)  | 1.12 (0.97, 1.29) |      |
|               | Tertile 2 | 4234 (23.5) | 503 (24.8)  | 1.14 (0.98, 1.33) |      |
|               | Tertile 3 | 4217 (23.4) | 558 (27.5)  | 1.16 (1.00, 1.35) |      |
| 2,4,5 T       | Never use | 7999 (82.2) | 828 (71.6)  | Ref               | 0.05 |
|               | Tertile 1 | 980 (10.1)  | 194 (16.8)  | 1.62 (1.35, 1.94) |      |
|               | Tertile 2 | 320 (3.3)   | 63 (5.4)    | 1.60 (1.20, 2.15) |      |
|               | Tertile 3 | 435 (4.5)   | 71 (6.1)    | 1.32 (1.01, 1.74) |      |
| 2,4,5 T P     | Never use | 9291 (95.3) | 1071 (92.5) | Ref               | 0.24 |
|               | Tertile 1 | 229 (2.3)   | 43 (3.7)    | 1.34 (0.94, 1.89) |      |
|               | Tertile 2 | 88 (0.9)    | 19 (1.6)    | 1.48 (0.89, 2.48) |      |
|               | Tertile 3 | 138 (1.4)   | 25 (2.2)    | 1.24 (0.79, 1.93) |      |
| Atrazine      | Never use | 4863 (26.8) | 473 (23.2)  | Ref               | 0.24 |
|               | Tertile 1 | 4413 (24.4) | 503 (24.7)  | 1.12 (0.97, 1.28) |      |
|               | Tertile 2 | 4930 (27.2) | 567 (27.8)  | 1.05 (0.92, 1.21) |      |
|               | Tertile 3 | 3913 (21.6) | 495 (24.3)  | 1.13 (0.98, 1.31) |      |
| Cyanazine     | Never use | 9498 (55.6) | 1008 (51.7) | Ref               | 0.37 |
|               | Tertile 1 | 3076 (18.0) | 381 (19.5)  | 1.07 (0.94, 1.22) |      |
|               | Tertile 2 | 2434 (14.2) | 297 (15.2)  | 1.06 (0.92, 1.23) |      |
|               | Tertile 3 | 2090 (12.2) | 263 (13.5)  | 1.08 (0.93, 1.26) |      |
| Metribuzin    | Never use | 5550 (58.3) | 605 (53.6)  | Ref               | 0.10 |
|               | Tertile 1 | 1916 (20.1) | 248 (22.0)  | 1.08 (0.91, 1.29) |      |
|               | Tertile 2 | 1052 (11.0) | 131 (11.6)  | 1.05 (0.85, 1.31) |      |
|               | Tertile 3 | 1003 (10.5) | 144 (12.8)  | 1.21 (0.98, 1.50) |      |

Abbreviation: 2,4-D, 2,4-Dichlorophenoxyacetic acid; 2,4,5-T, 2,4,5-Trichlorophenoxyacetic acid; CI, Confidence Intervals; EPTC, S-Ethyl dipropylthiocarbamate; OI, Olfactory Impairment; OR, Odds Ratio  
Odds ratios are adjusted for age, sex, state of residence, education, smoking status, ever performed following tasks at least once each year (repair engines, replace asbestos brake linings, handle stored grain, work in swine confinement areas, weld and paint), and correlated pesticides (correlated ever-use of pesticides with Spearman correlation  $\geq 0.40$ )  
<sup>a</sup>Exposure categories: Never use and categorized into tertiles among users

Supplementary table 6: Average days per year of use at enrollment in relation to self-reported olfactory impairment in the Agricultural Health Study

| Pesticide    | Days    | No OI       | OR (95% CI)       | P      |
|--------------|---------|-------------|-------------------|--------|
| Aldrin       | 0 d     | 849 (75.7)  | Ref               | 0.32   |
|              | <5 d    | 141 (12.6)  | 1.09 (0.87, 1.35) |        |
|              | 5-9 d   | 94 (8.4)    | 1.07 (0.83, 1.38) |        |
|              | > 10 d  | 38 (3.4)    | 1.21 (0.83, 1.78) |        |
| Chlordane    | 0 d     | 857 (73.0)  | Ref               | 0.01   |
|              | <5 d    | 246 (21)    | 1.37 (1.16, 1.61) |        |
|              | 5-9 d   | 49 (4.2)    | 1.14 (0.82, 1.56) |        |
|              | > 10 d  | 22 (1.9)    | 1.62 (1.00, 2.62) |        |
| DDT          | 0 d     | 794 (69.3)  | Ref               | 0.01   |
|              | <5 d    | 191 (16.7)  | 1.33 (1.10, 1.62) |        |
|              | 5-9 d   | 76 (6.6)    | 1.16 (0.89, 1.53) |        |
|              | 10-19 d | 42 (3.7)    | 1.28 (0.90, 1.83) |        |
|              | 20-39 d | 27 (2.4)    | 2.09 (1.34, 3.27) |        |
|              | >40 d   | 15 (1.3)    | 1.35 (0.76, 2.41) |        |
| Heptachlor   | 0 d     | 938 (82.3)  | Ref               | 0.16   |
|              | <5 d    | 113 (9.9)   | 1.13 (0.90, 1.42) |        |
|              | 5-9 d   | 57 (5.0)    | 0.92 (0.68, 1.25) |        |
|              | > 10 d  | 32 (2.8)    | 1.54 (1.02, 2.32) |        |
| Toxaphene    | 0 d     | 1050 (85.6) | Ref               | 0.01   |
|              | <5 d    | 109 (8.9)   | 1.34 (1.08, 1.67) |        |
|              | 5-9 d   | 37 (3.0)    | 1.04 (0.73, 1.49) |        |
|              | 10-19 d | 16 (1.3)    | 1.19 (0.69, 2.05) |        |
|              | >20 d   | 14 (1.1)    | 2.31 (1.26, 4.25) |        |
| Lindane      | 0 d     | 957 (78.4)  | Ref               | <.0001 |
|              | <5 d    | 163 (13.3)  | 1.40 (1.17, 1.68) |        |
|              | 5-9 d   | 56 (4.6)    | 1.33 (0.99, 1.78) |        |
|              | 10-19 d | 27 (2.2)    | 1.55 (1.02, 2.36) |        |
|              | >20 d   | 18 (1.5)    | 3.07 (1.76, 5.35) |        |
| Aldicarb     | 0 d     | 1099 (94.3) | Ref               | 0.10   |
|              | <5 d    | 31 (2.7)    | 1.02 (0.68, 1.51) |        |
|              | 5-9 d   | 25 (2.1)    | 1.12 (0.72, 1.74) |        |
|              | >10 d   | 11 (0.9)    | 0.51 (0.27, 0.96) |        |
| Carbaryl     | 0 d     | 605 (52.3)  | Ref               | 0.06   |
|              | <5 d    | 345 (29.8)  | 1.24 (1.07, 1.44) |        |
|              | 5-9 d   | 112 (9.7)   | 1.08 (0.85, 1.36) |        |
|              | 10-19 d | 62 (5.4)    | 1.30 (0.96, 1.77) |        |
|              | >20 d   | 32 (2.8)    | 1.43 (0.95, 2.15) |        |
| Carbofuran   | 0 d     | 1278 (65.9) | Ref               | 0.03   |
|              | <5 d    | 314 (16.2)  | 1.14 (0.99, 1.30) |        |
|              | 5-9 d   | 216 (11.1)  | 1.22 (1.04, 1.43) |        |
|              | 10-19 d | 102 (5.3)   | 1.11 (0.89, 1.38) |        |
|              | >20 d   | 29 (1.5)    | 1.26 (0.84, 1.87) |        |
| Chlorpyrifos | 0 d     | 1094 (53.5) | Ref               | 0.27   |
|              | <5 d    | 469 (23.0)  | 1.19 (1.06, 1.33) |        |
|              | 5-9 d   | 294 (14.4)  | 1.14 (0.99, 1.31) |        |
|              | 10-19 d | 141 (6.9)   | 1.03 (0.86, 1.24) |        |
|              | >20 d   | 45 (2.2)    | 1.15 (0.84, 1.58) |        |
| Coumaphos    | 0 d     | 1694 (88.8) | Ref               | 0.97   |

|                      |         |             |                   |        |
|----------------------|---------|-------------|-------------------|--------|
|                      | <5 d    | 147 (7.7)   | 1.23 (1.02, 1.47) |        |
|                      | 5-9 d   | 42 (2.2)    | 1.12 (0.81, 1.55) |        |
|                      | 10-19 d | 10 (0.5)    | 0.59 (0.31, 1.13) |        |
|                      | >20 d   | 14 (0.7)    | 1.06 (0.6, 1.86)  |        |
| Diazinon             | 0 d     | 866 (72.9)  | Ref               | 0.0008 |
|                      | <5 d    | 193 (16.2)  | 1.29 (1.09, 1.54) |        |
|                      | 5-9 d   | 83 (7.0)    | 1.39 (1.08, 1.79) |        |
|                      | 10-19 d | 32 (2.7)    | 1.54 (1.04, 2.28) |        |
|                      | >20 d   | 14 (1.2)    | 1.64 (0.91, 2.96) |        |
| Dichlorvos           | 0 d     | 1631 (84.3) | Ref               | 0.03   |
|                      | <5 d    | 119 (6.2)   | 1.12 (0.92, 1.38) |        |
|                      | 5-9 d   | 61 (3.2)    | 1.33 (1.00, 1.76) |        |
|                      | 10-19 d | 43 (2.2)    | 1.28 (0.92, 1.77) |        |
|                      | 20-39 d | 27 (1.4)    | 1.13 (0.75, 1.70) |        |
|                      | 40-59 d | 22 (1.1)    | 1.56 (0.98, 2.47) |        |
|                      | >60 d   | 31 (1.6)    | 1.29 (0.88, 1.90) |        |
| Fonofos              | 0 d     | 1462 (75.0) | Ref               | 0.71   |
|                      | <5 d    | 228 (11.7)  | 1.09 (0.94, 1.27) |        |
|                      | 5-9 d   | 148 (7.6)   | 0.87 (0.72, 1.04) |        |
|                      | 10-19 d | 94 (4.8)    | 1.01 (0.81, 1.27) |        |
|                      | >20 d   | 18 (0.9)    | 1.03 (0.63, 1.70) |        |
| Malathion            | 0 d     | 345 (28.3)  | Ref               | 0.01   |
|                      | <5 d    | 586 (48)    | 1.21 (1.05, 1.40) |        |
|                      | 5-9 d   | 178 (14.6)  | 1.28 (1.05, 1.56) |        |
|                      | 10-19 d | 74 (6.1)    | 1.34 (1.02, 1.76) |        |
|                      | 20-39 d | 23 (1.9)    | 1.29 (0.82, 2.03) |        |
|                      | >40 d   | 15 (1.2)    | 1.76 (0.99, 3.13) |        |
| Parathion            | 0 d     | 1099 (90.5) | Ref               | 0.34   |
|                      | <5 d    | 66 (5.4)    | 1.41 (1.07, 1.87) |        |
|                      | 5-9 d   | 27 (2.2)    | 1.39 (0.91, 2.12) |        |
|                      | 10-19 d | 12 (1.0)    | 1.07 (0.58, 1.97) |        |
|                      | >20 d   | 10 (0.8)    | 1.09 (0.56, 2.14) |        |
| Phorate              | 0 d     | 741 (63.5)  | Ref               | 0.47   |
|                      | <5 d    | 222 (19.0)  | 1.11 (0.94, 1.32) |        |
|                      | 5-9 d   | 149 (12.8)  | 1.07 (0.88, 1.30) |        |
|                      | >10 d   | 55 (4.7)    | 0.85 (0.64, 1.15) |        |
| Terbufos             | 0 d     | 1100 (56.3) | Ref               | 0.08   |
|                      | <5 d    | 337 (17.3)  | 1.06 (0.93, 1.21) |        |
|                      | 5-9 d   | 280 (14.3)  | 1.04 (0.90, 1.20) |        |
|                      | 10-19 d | 188 (9.6)   | 1.17 (0.99, 1.38) |        |
|                      | >20 d   | 48 (2.5)    | 1.15 (0.85, 1.57) |        |
| Permethrin (crops)   | 0 d     | 1626 (84.8) | Ref               | 0.01   |
|                      | <5 d    | 168 (8.8)   | 1.15 (0.97, 1.36) |        |
|                      | 5-9 d   | 60 (3.1)    | 1.32 (1.00, 1.74) |        |
|                      | 10-19 d | 37 (1.9)    | 1.28 (0.90, 1.82) |        |
|                      | >20 d   | 26 (1.4)    | 1.46 (0.96, 2.22) |        |
| Permethrin (poultry) | 0 d     | 1611 (82.7) | Ref               | 0.28   |
|                      | <5 d    | 196 (10.1)  | 1.24 (1.05, 1.46) |        |
|                      | 5-9 d   | 70 (3.6)    | 1.17 (0.91, 1.52) |        |
|                      | 10-19 d | 43 (2.2)    | 1.27 (0.92, 1.76) |        |
|                      | 20-39 d | 14 (0.7)    | 1.01 (0.58, 1.77) |        |



|                                   |         |             |                   |      |
|-----------------------------------|---------|-------------|-------------------|------|
| CCl <sub>4</sub> /CS <sub>2</sub> | >40 d   | 15 (0.8)    | 1.10 (0.64, 1.89) | 0.02 |
|                                   | 0 d     | 1146 (93.1) | Ref               |      |
|                                   | 1 d     | 35 (2.8)    | 1.4 (0.96, 2.04)  |      |
|                                   | >2 d    | 50 (4.1)    | 1.38 (1.00, 1.9)  |      |
| Aluminum Phosphide                | 0 d     | 1181 (95.8) | Ref               | 0.55 |
|                                   | 1 d     | 29 (2.4)    | 1.10 (0.74, 1.63) |      |
|                                   | >2 d    | 23 (1.9)    | 1.12 (0.72, 1.74) |      |
| Ethylene Dibromide                | 0 d     | 1182 (95.6) | Ref               | 0.35 |
|                                   | 1 d     | 24 (1.9)    | 1.13 (0.73, 1.75) |      |
|                                   | >2 d    | 31 (2.5)    | 1.19 (0.80, 1.77) |      |
| Methyl Bromide                    | 0 d     | 1673 (86.8) | Ref               | 0.87 |
|                                   | 1 d     | 118 (6.1)   | 1.03 (0.83, 1.30) |      |
|                                   | 2-5 d   | 107 (5.6)   | 0.98 (0.77, 1.24) |      |
|                                   | 6-10 d  | 14 (0.7)    | 0.74 (0.42, 1.30) |      |
|                                   | >11 d   | 15 (0.8)    | 1.15 (0.66, 2.00) |      |
| Benomyl                           | 0 d     | 1041 (92.3) | Ref               | 0.27 |
|                                   | 1 d     | 22 (2.0)    | 1.6 (1.00, 2.56)  |      |
|                                   | 2-5 d   | 24 (2.1)    | 0.98 (0.62, 1.57) |      |
|                                   | 5-9 d   | 25 (2.2)    | 1.78 (1.1, 2.87)  |      |
|                                   | >10 d   | 16 (1.4)    | 1.13 (0.64, 2.00) |      |
| Captan                            | 0 d     | 1649 (86.2) | Ref               | 0.01 |
|                                   | 1 d     | 169 (8.8)   | 1.23 (1.04, 1.46) |      |
|                                   | 2-5 d   | 32 (1.7)    | 1.14 (0.78, 1.66) |      |
|                                   | 6-10 d  | 34 (1.8)    | 1.49 (1.03, 2.17) |      |
|                                   | 11-20 d | 18 (0.9)    | 1.38 (0.83, 2.28) |      |
|                                   | >20 d   | 12 (0.6)    | 1.63 (0.87, 3.05) |      |
| Chlorothalonil                    | 0 d     | 1791 (93.3) | Ref               | 0.21 |
|                                   | 1 d     | 21 (1.1)    | 1.17 (0.73, 1.86) |      |
|                                   | 2-5 d   | 41 (2.1)    | 1.17 (0.83, 1.66) |      |
|                                   | 6-10 d  | 29 (1.5)    | 0.96 (0.64, 1.45) |      |
|                                   | >11 d   | 38 (2.0)    | 1.31 (0.91, 1.90) |      |
| Maneb/Mancozeb                    | 0 d     | 1089 (93.1) | Ref               | 0.99 |
|                                   | 1 d     | 13 (1.1)    | 0.97 (0.54, 1.74) |      |
|                                   | 2-5 d   | 23 (2.0)    | 0.72 (0.45, 1.14) |      |
|                                   | 5-9 d   | 26 (2.2)    | 1.37 (0.87, 2.16) |      |
|                                   | >10 d   | 19 (1.6)    | 0.92 (0.55, 1.52) |      |
| Metalaxyl                         | 0 d     | 996 (81.9)  | Ref               | 0.02 |
|                                   | 1 d     | 64 (5.3)    | 1.12 (0.85, 1.47) |      |
|                                   | 2-5 d   | 96 (7.9)    | 1.09 (0.85, 1.40) |      |
|                                   | 5-9 d   | 34 (2.8)    | 1.13 (0.76, 1.66) |      |
|                                   | >10 d   | 26 (2.1)    | 1.74 (1.11, 2.73) |      |
| Alachlor                          | 0 d     | 795 (41.0)  | Ref               | 0.61 |
|                                   | <5 d    | 458 (23.6)  | 1.11 (0.98, 1.25) |      |
|                                   | 5-9 d   | 368 (19.0)  | 1.00 (0.87, 1.14) |      |
|                                   | 10-19 d | 251 (12.9)  | 1.23 (1.06, 1.44) |      |
|                                   | 20-39 d | 55 (2.8)    | 0.89 (0.67, 1.19) |      |
| Butylate                          | >40 d   | 12 (0.6)    | 1.01 (0.55, 1.85) | 0.19 |
|                                   | 0 d     | 790 (67.8)  | Ref               |      |
|                                   | <5 d    | 148 (12.7)  | 1.03 (0.85, 1.25) |      |
|                                   | 5-9 d   | 145 (12.4)  | 1.00 (0.82, 1.22) |      |

|                   |         |             |                   |       |
|-------------------|---------|-------------|-------------------|-------|
| Chlorimuron Ethyl | 10-19 d | 71 (6.1)    | 1.37 (1.05, 1.80) | 0.31  |
|                   | >20 d   | 12 (1.0)    | 0.97 (0.53, 1.79) |       |
|                   | 0 d     | 828 (67.3)  | Ref               |       |
|                   | <5 d    | 275 (22.3)  | 1.05 (0.90, 1.21) |       |
|                   | 5-9 d   | 94 (7.6)    | 1.07 (0.85, 1.35) |       |
| Dicamba           | >10 d   | 34 (2.8)    | 1.16 (0.80, 1.68) | 0.47  |
|                   | 0 d     | 794 (41.0)  | Ref               |       |
|                   | <5 d    | 656 (33.8)  | 1.18 (1.04, 1.33) |       |
|                   | 5-9 d   | 324 (16.7)  | 1.04 (0.90, 1.21) |       |
|                   | 10-19 d | 123 (6.3)   | 1.06 (0.86, 1.31) |       |
| EPTC              | >20 d   | 41 (2.1)    | 1.27 (0.90, 1.78) | 0.35  |
|                   | 0 d     | 1488 (77.2) | Ref               |       |
|                   | <5 d    | 215 (11.2)  | 0.96 (0.83, 1.13) |       |
|                   | 5-9 d   | 145 (7.5)   | 1.17 (0.97, 1.41) |       |
|                   | 10-19 d | 59 (3.1)    | 1.04 (0.79, 1.38) |       |
| Glyphosate        | >20 d   | 20 (1.0)    | 1.08 (0.67, 1.72) | 0.003 |
|                   | 0 d     | 381 (18.6)  | Ref               |       |
|                   | <5 d    | 756 (36.9)  | 1.29 (1.13, 1.47) |       |
|                   | 5-9 d   | 457 (22.3)  | 1.28 (1.11, 1.48) |       |
|                   | 10-19 d | 330 (16.1)  | 1.54 (1.31, 1.81) |       |
|                   | 20-39 d | 100 (4.9)   | 1.43 (1.13, 1.82) |       |
|                   | 40-59 d | 13 (0.6)    | 1.18 (0.66, 2.11) |       |
|                   | >60 d   | 11 (0.5)    | 1.67 (0.87, 3.19) |       |
| Imazethapyr       | 0 d     | 1001 (52.9) | Ref               | 0.61  |
|                   | <5 d    | 456 (24.1)  | 0.99 (0.86, 1.13) |       |
|                   | 5-9 d   | 292 (15.4)  | 0.86 (0.74, 1.00) |       |
|                   | 10-19 d | 119 (6.3)   | 1.05 (0.85, 1.3)  |       |
|                   | >20 d   | 26 (1.4)    | 0.94 (0.62, 1.42) |       |
| Metolachlor       | 0 d     | 989 (50.6)  | Ref               | 0.21  |
|                   | <5 d    | 424 (21.7)  | 1.19 (1.05, 1.35) |       |
|                   | 5-9 d   | 319 (16.3)  | 0.94 (0.82, 1.08) |       |
|                   | 10-19 d | 168 (8.6)   | 0.89 (0.75, 1.06) |       |
|                   | >20 d   | 55 (2.8)    | 1.01 (0.75, 1.35) |       |
| Paraquat          | 0 d     | 1022 (83.2) | Ref               | 0.002 |
|                   | <5 d    | 135 (11.0)  | 1.19 (0.97, 1.45) |       |
|                   | 5-9 d   | 34 (2.8)    | 1.02 (0.70, 1.48) |       |
|                   | 10-19 d | 23 (1.9)    | 1.72 (1.08, 2.75) |       |
|                   | >20 d   | 14 (1.1)    | 2.06 (1.13, 3.75) |       |
| Pendimethalin     | 0 d     | 755 (61.3)  | Ref               | 0.18  |
|                   | <5 d    | 251 (20.4)  | 1.07 (0.92, 1.25) |       |
|                   | 5-9 d   | 156 (12.7)  | 1.13 (0.94, 1.37) |       |
|                   | 10-19 d | 54 (4.4)    | 1.13 (0.84, 1.53) |       |
|                   | >20 d   | 16 (1.3)    | 1.16 (0.68, 1.98) |       |
| Petroleum         | 0 d     | 911 (74.1)  | Ref               | 0.04  |
|                   | <5 d    | 160 (13.0)  | 1.28 (1.07, 1.54) |       |
|                   | 5-9 d   | 81 (6.6)    | 1.15 (0.90, 1.47) |       |
|                   | 10-19 d | 41 (3.3)    | 1.35 (0.96, 1.89) |       |
|                   | 20-39 d | 16 (1.3)    | 1.24 (0.73, 2.11) |       |
| Trifluralin       | >40 d   | 20 (1.6)    | 1.36 (0.84, 2.20) | 0.15  |
|                   | 0 d     | 742 (40.4)  | Ref               |       |
|                   | <5 d    | 412 (22.4)  | 1.05 (0.91, 1.21) |       |

|            |         |             |                   |        |
|------------|---------|-------------|-------------------|--------|
|            | 5-9 d   | 422 (23.0)  | 1.11 (0.96, 1.29) |        |
|            | 10-19 d | 198 (10.8)  | 1.06 (0.88, 1.27) |        |
|            | >20 d   | 63 (3.4)    | 1.24 (0.93, 1.65) |        |
| 2,4-D      | 0 d     | 364 (17.9)  | Ref               | 0.67   |
|            | <5 d    | 717 (35.2)  | 1.17 (1.02, 1.34) |        |
|            | 5-9 d   | 487 (23.9)  | 1.05 (0.91, 1.23) |        |
|            | 10-19 d | 325 (16.0)  | 1.21 (1.02, 1.43) |        |
|            | 20-39 d | 112 (5.5)   | 1.12 (0.89, 1.41) |        |
|            | 40-59 d | 21 (1.0)    | 1.16 (0.72, 1.86) |        |
|            | >60 d   | 10 (0.5)    | 1.00 (0.51, 1.95) |        |
| 2,4,5 T    | 0 d     | 828 (71.6)  | Ref               | 0.0002 |
|            | <5 d    | 238 (20.6)  | 1.56 (1.32, 1.85) |        |
|            | 5-9 d   | 60 (5.2)    | 1.45 (1.08, 1.94) |        |
|            | >10 d   | 30 (2.6)    | 1.58 (1.05, 2.38) |        |
| 2,4,5 T P  | 0 d     | 1071 (92.5) | Ref               | 0.06   |
|            | <5 d    | 57 (4.9)    | 1.37 (1.01, 1.86) |        |
|            | 5-9 d   | 15 (1.3)    | 0.98 (0.56, 1.72) |        |
|            | >10 d   | 15 (1.3)    | 1.70 (0.95, 3.03) |        |
| Atrazine   | 0 d     | 473 (23.2)  | Ref               | 0.95   |
|            | <5 d    | 630 (30.9)  | 1.08 (0.95, 1.23) |        |
|            | 5-9 d   | 546 (26.8)  | 1.13 (0.98, 1.30) |        |
|            | 10-19 d | 289 (14.2)  | 1.09 (0.92, 1.28) |        |
|            | 20-39 d | 87 (4.3)    | 1.11 (0.87, 1.43) |        |
|            | >40 d   | 14 (0.7)    | 0.76 (0.44, 1.33) |        |
| Cyanazine  | 0 d     | 1008 (51.7) | Ref               | 0.53   |
|            | <5 d    | 452 (23.2)  | 1.09 (0.96, 1.24) |        |
|            | 5-9 d   | 303 (15.5)  | 1.05 (0.91, 1.21) |        |
|            | 10-19 d | 138 (7.1)   | 1.04 (0.85, 1.26) |        |
|            | >20 d   | 49 (2.5)    | 1.11 (0.82, 1.52) |        |
| Metribuzin | 0 d     | 605 (53.6)  | Ref               | 0.10   |
|            | <5 d    | 305 (27.0)  | 1.08 (0.92, 1.27) |        |
|            | 5-9 d   | 160 (14.2)  | 1.07 (0.87, 1.31) |        |
|            | 10-19 d | 48 (4.3)    | 1.37 (0.99, 1.91) |        |
|            | >20 d   | 10 (0.9)    | 1.28 (0.65, 2.55) |        |

Abbreviation: 2,4-D, 2,4-Dichlorophenoxyacetic acid; 2,4,5-T, 2,4,5-Trichlorophenoxyacetic acid; CI, Confidence Intervals; EPTC, S-Ethyl dipropylthiocarbamate; OI, Olfactory Impairment; OR, Odds Ratio

Odds ratios are adjusted for age, sex, state of residence, education, smoking status, ever performed following tasks at least once each year (repair engines, replace asbestos brake linings, handle stored grain, work in swine confinement areas, weld and paint), and correlated pesticides (correlated ever-use of pesticides with Spearman correlation  $\geq 0.40$ )

<sup>a</sup>Exposure categories: Never-use (0d) and use categorized by average days per year of use

Supplementary table 7: Intensity-weighted lifetime days of use through the first follow-up in relation to self-reported olfactory impairment with onset reported  $\leq 10$  years before the third follow-up in the Agricultural Health Study (n=19,563)

| Pesticide    | Exposure <sup>a</sup> | OR (95% CI)       | P-trend |
|--------------|-----------------------|-------------------|---------|
| Lindane      | Never                 | Ref               | 0.001   |
|              | >0–328                | 1.24 (0.91, 1.70) |         |
|              | >328–1188             | 1.50 (1.12, 2.02) |         |
|              | >1188                 | 1.56 (1.17, 2.09) |         |
| Aldicarb     | Never                 | Ref               | 0.70    |
|              | >0–630                | 1.09 (0.66, 1.80) |         |
|              | >630–2426             | 1.19 (0.71, 1.98) |         |
|              | >2426                 | 0.88 (0.50, 1.54) |         |
| Carbaryl     | Never                 | Ref               | 0.55    |
|              | >0–395                | 1.18 (0.94, 1.48) |         |
|              | >395–2048             | 1.28 (1.01, 1.61) |         |
|              | >2048                 | 1.18 (0.90, 1.55) |         |
| Carbofuran   | Never                 | Ref               | 0.87    |
|              | >0–347                | 1.27 (1.05, 1.54) |         |
|              | >347–1241             | 1.26 (1.04, 1.51) |         |
|              | >1241                 | 1.01 (0.82, 1.24) |         |
| Chlorpyrifos | Never                 | Ref               | 0.74    |
|              | >0–465                | 1.21 (1.03, 1.43) |         |
|              | >465–1776             | 1.13 (0.95, 1.34) |         |
|              | >1776                 | 1.06 (0.89, 1.27) |         |
| Coumaphos    | Never                 | Ref               | 0.43    |
|              | >0–394                | 1.04 (0.75, 1.46) |         |
|              | >394–1382             | 1.27 (0.94, 1.73) |         |
|              | >1382                 | 0.82 (0.56, 1.18) |         |
| Diazinon     | Never                 | Ref               | 0.11    |
|              | >0–324                | 1.43 (1.10, 1.86) |         |
|              | >324–1147             | 1.13 (0.85, 1.50) |         |
|              | >1147                 | 1.29 (0.97, 1.71) |         |
| Dichlorvos   | Never                 | Ref               | 0.13    |
|              | >0–543                | 1.41 (1.09, 1.83) |         |
|              | >543–3923             | 1.11 (0.84, 1.48) |         |
|              | >3923                 | 1.28 (0.96, 1.69) |         |
| Fonofos      | Never                 | Ref               | 0.09    |
|              | >0–438                | 1.01 (0.75, 1.37) |         |
|              | >438–1550             | 1.31 (1.00, 1.72) |         |
|              | >1550                 | 1.26 (0.96, 1.66) |         |
| Malathion    | Never                 | Ref               | 0.52    |
|              | >0–384                | 1.18 (0.95, 1.47) |         |
|              | >384–1286             | 0.90 (0.71, 1.13) |         |
|              | >1286                 | 0.95 (0.76, 1.19) |         |
| Parathion    | Never                 | Ref               | 0.01    |
|              | >0–327                | 1.46 (1.17, 1.83) |         |
|              | >327–1622             | 1.36 (1.09, 1.70) |         |
|              | >1622                 | 1.54 (1.25, 1.91) |         |
| Phorate      | Never                 | Ref               | 0.20    |
|              | >0–315                | 1.05 (0.81, 1.34) |         |
|              | >315–1134             | 1.28 (1.01, 1.62) |         |

|                      |           |                   |      |
|----------------------|-----------|-------------------|------|
| Terbufos             | >1134     | 0.82 (0.62, 1.07) | 0.05 |
|                      | Never     | Ref               |      |
|                      | >0–637    | 1.08 (0.90, 1.30) |      |
|                      | >637–2300 | 0.98 (0.81, 1.18) |      |
| Permethrin (crops)   | >2300     | 1.20 (1.01, 1.43) | 0.00 |
|                      | Never     | Ref               |      |
|                      | >0–267    | 1.06 (0.80, 1.41) |      |
|                      | >267–1004 | 0.97 (0.72, 1.32) |      |
| Permethrin (animals) | >1004     | 1.47 (1.14, 1.89) | 0.06 |
|                      | Never     | Ref               |      |
|                      | >0–385    | 1.31 (1.02, 1.69) |      |
|                      | >385–1478 | 1.39 (1.09, 1.78) |      |
| Aluminum Phosphide   | >1478     | 1.26 (0.98, 1.63) | 0.52 |
|                      | Never     | Ref               |      |
|                      | >0–64     | 1.52 (0.86, 2.66) |      |
|                      | >64–257   | 1.51 (0.85, 2.70) |      |
| Ethylene Dibromide   | >257      | 0.67 (0.29, 1.55) | 0.18 |
|                      | Never     | Ref               |      |
|                      | >0–196    | 0.77 (0.36, 1.68) |      |
|                      | >196–930  | 1.30 (0.70, 2.39) |      |
| Methyl Bromide       | >930      | 1.42 (0.80, 2.54) | 0.31 |
|                      | Never     | Ref               |      |
|                      | >0–294    | 0.99 (0.72, 1.36) |      |
|                      | >294–1260 | 1.07 (0.79, 1.46) |      |
| Benomyl              | >1260     | 0.84 (0.60, 1.18) | 0.06 |
|                      | Never     | Ref               |      |
|                      | >0–350    | 1.69 (1.04, 2.75) |      |
|                      | >350–1792 | 1.07 (0.59, 1.94) |      |
| Captan               | >1792     | 1.76 (1.05, 2.97) | 0.11 |
|                      | Never     | Ref               |      |
|                      | >0–10     | 1.20 (0.90, 1.62) |      |
|                      | >10–466   | 1.28 (0.96, 1.69) |      |
| Chlorothalonil       | >466      | 1.28 (0.97, 1.71) | 0.44 |
|                      | Never     | Ref               |      |
|                      | >0–588    | 1.25 (0.83, 1.88) |      |
|                      | >588–3276 | 1.22 (0.81, 1.83) |      |
| Maneb/Mancozeb       | >3276     | 1.19 (0.78, 1.83) | 0.59 |
|                      | Never     | Ref               |      |
|                      | >0–432    | 0.89 (0.50, 1.56) |      |
|                      | >432–2688 | 1.24 (0.75, 2.03) |      |
| Metalaxyl            | >2688     | 1.14 (0.68, 1.91) | 0.60 |
|                      | Never     | Ref               |      |
|                      | >0–255    | 1.15 (0.84, 1.57) |      |
|                      | >255–1323 | 1.02 (0.72, 1.46) |      |
| Alachlor             | >1323     | 1.13 (0.77, 1.64) | 0.18 |
|                      | Never     | Ref               |      |
|                      | >0–784    | 0.99 (0.83, 1.17) |      |
|                      | >784–2955 | 1.08 (0.91, 1.27) |      |
| Butylate             | >2955     | 1.11 (0.94, 1.31) | 0.32 |
|                      | Never     | Ref               |      |
|                      | >0–455    | 1.08 (0.83, 1.41) |      |

|                       |            |                   |      |
|-----------------------|------------|-------------------|------|
|                       | >455–1512  | 0.86 (0.64, 1.15) |      |
|                       | >1512      | 1.17 (0.90, 1.53) |      |
| Chlorimuron Ethyl     | Never      | Ref               | 0.62 |
|                       | >0–248     | 1.07 (0.83, 1.38) |      |
|                       | >248–735   | 1.03 (0.80, 1.33) |      |
|                       | >735       | 1.07 (0.83, 1.37) |      |
| Dicamba               | Never      | Ref               | 0.59 |
|                       | >0–680     | 1.15 (0.96, 1.39) |      |
|                       | >680–2352  | 1.24 (1.03, 1.50) |      |
|                       | >2352      | 1.12 (0.93, 1.36) |      |
| EPTC                  | Never      | Ref               | 0.54 |
|                       | >0–315     | 0.97 (0.76, 1.24) |      |
|                       | >315–1176  | 1.14 (0.91, 1.43) |      |
|                       | >1176      | 1.06 (0.83, 1.34) |      |
| Glyphosate            | Never      | Ref               | 0.03 |
|                       | >0–983     | 1.33 (1.06, 1.67) |      |
|                       | >983–3402  | 1.35 (1.09, 1.68) |      |
|                       | >3402      | 1.45 (1.16, 1.81) |      |
| Imazethapyr           | Never      | Ref               | 0.66 |
|                       | >0–400     | 0.98 (0.81, 1.19) |      |
|                       | >400–1176  | 0.92 (0.76, 1.12) |      |
|                       | >1176      | 0.96 (0.78, 1.17) |      |
| Metolachlor           | Never      | Ref               | 0.25 |
|                       | >0–765     | 1.23 (1.04, 1.45) |      |
|                       | >765–2688  | 1.07 (0.90, 1.28) |      |
|                       | >2688      | 0.95 (0.79, 1.14) |      |
| Paraquat              | Never      | Ref               | 0.10 |
|                       | >0–289     | 1.21 (0.88, 1.68) |      |
|                       | >289–1171  | 1.21 (0.86, 1.69) |      |
|                       | >1171      | 1.35 (0.95, 1.92) |      |
| Pendimethalin         | Never      | Ref               | 0.40 |
|                       | >0–354     | 0.98 (0.78, 1.22) |      |
|                       | >354–1176  | 1.17 (0.95, 1.45) |      |
|                       | >1176      | 1.08 (0.86, 1.35) |      |
| Petroleum distillates | Never      | Ref               | 0.05 |
|                       | >0–490     | 1.17 (0.88, 1.56) |      |
|                       | >490–2320  | 1.32 (1.00, 1.73) |      |
|                       | >2320      | 1.31 (1.00, 1.73) |      |
| Trifluralin           | Never      | Ref               | 0.24 |
|                       | >0–1050    | 0.93 (0.77, 1.13) |      |
|                       | >1050–3906 | 1.08 (0.89, 1.31) |      |
|                       | >3906      | 1.09 (0.90, 1.33) |      |
| 2,4-D                 | Never      | Ref               | 0.11 |
|                       | >0–1511    | 1.20 (0.98, 1.46) |      |
|                       | >1511–5428 | 1.12 (0.92, 1.37) |      |
|                       | >5428      | 1.25 (1.02, 1.53) |      |
| 2,4,5-T               | Never      | Ref               | 0.19 |
|                       | >0–289     | 1.76 (1.35, 2.31) |      |
|                       | >289–971   | 1.56 (1.16, 2.09) |      |
|                       | >971       | 1.30 (0.95, 1.76) |      |
| Atrazine              | Never      | Ref               | 0.51 |

|            |            |                   |      |
|------------|------------|-------------------|------|
|            | >0–1232    | 1.06 (0.88, 1.28) |      |
|            | >1232–4550 | 1.05 (0.87, 1.26) |      |
|            | >4550      | 1.09 (0.90, 1.30) |      |
| Cyanazine  | Never      | Ref               | 0.64 |
|            | >0–540     | 1.18 (0.99, 1.42) |      |
|            | >540–2222  | 1.14 (0.95, 1.36) |      |
|            | >2222      | 1.09 (0.91, 1.31) |      |
| Metribuzin | Never      | Ref               | 0.50 |
|            | >0–333     | 1.10 (0.86, 1.40) |      |
|            | >333–1040  | 1.01 (0.78, 1.31) |      |
|            | >1040      | 1.11 (0.86, 1.43) |      |

Abbreviation: 2,4-D, 2,4-Dichlorophenoxyacetic acid; 2,4,5-T, 2,4,5-Trichlorophenoxyacetic acid; CI, Confidence Intervals; EPTC, S-Ethyl dipropylthiocarbamate; OI, Olfactory Impairment; OR, Odds Ratio

Odds ratios are adjusted for age, sex, state of residence, education, smoking status, ever performed following tasks at least once each year (repair engines, replace asbestos brake linings, handle stored grain, work in swine confinement areas, weld and paint), and correlated pesticides (correlated ever-use of pesticides with Spearman correlation  $\geq 0.40$ )

<sup>a</sup>Exposure categories: Never use and categorized into tertiles among users

Supplementary table 8: Ever-use of pesticide at enrollment in relation to self-reported olfactory impairment reported in the third follow-up in the Agricultural Health Study using inverse probability of censoring weights<sup>a</sup>

| Pesticides                        | OR (95% CI)       |
|-----------------------------------|-------------------|
| <b>Insecticide</b>                |                   |
| Organochlorine                    |                   |
| Aldrin                            | 1.04 (0.88, 1.22) |
| Chlordane                         | 1.09 (0.97, 1.23) |
| Dieldrin                          | 1.22 (1.01, 1.49) |
| DDT                               | 1.30 (1.14, 1.49) |
| Heptachlor                        | 1.08 (0.91, 1.27) |
| Toxaphene                         | 1.22 (1.07, 1.40) |
| Lindane                           | 1.20 (1.07, 1.35) |
| Carbamate                         |                   |
| Aldicarb                          | 1.01 (0.82, 1.25) |
| Carbaryl                          | 1.25 (1.12, 1.41) |
| Carbofuran                        | 1.13 (1.01, 1.26) |
| Organophosphate                   |                   |
| Chlorpyrifos                      | 1.13 (1.02, 1.25) |
| Coumaphos                         | 1.07 (0.92, 1.26) |
| Diazinon                          | 1.09 (0.97, 1.22) |
| Dichlorvos                        | 1.22 (1.06, 1.40) |
| Fonofos                           | 0.98 (0.87, 1.10) |
| Malathion                         | 1.32 (1.17, 1.50) |
| Parathion                         | 1.22 (1.07, 1.40) |
| Phorate                           | 1.00 (0.89, 1.11) |
| Terbufos                          | 1.07 (0.96, 1.19) |
| Permethrin (crops)                | 1.28 (1.10, 1.47) |
| Permethrin (animals)              | 1.2 (1.05, 1.38)  |
| <b>Fumigant</b>                   |                   |
| CCl <sub>4</sub> /CS <sub>2</sub> | 1.37 (1.13, 1.65) |
| Aluminum phosphide                | 1.07 (0.87, 1.32) |
| Ethylene dibromide                | 0.81 (0.62, 1.07) |
| Methyl bromide                    | 0.97 (0.80, 1.18) |
| <b>Fungicide</b>                  |                   |
| Benomyl                           | 0.90 (0.71, 1.16) |
| Captan                            | 1.25 (1.08, 1.44) |
| Chlorothalonil                    | 1.39 (1.09, 1.77) |
| Maneb                             | 1.16 (0.93, 1.45) |
| Metalaxyl                         | 1.14 (0.99, 1.32) |
| <b>Herbicide</b>                  |                   |
| Alachlor                          | 1.04 (0.93, 1.15) |
| Butylate                          | 1.05 (0.93, 1.18) |
| Chlorimuron ethyl                 | 0.99 (0.89, 1.10) |
| Dicamba                           | 1.11 (0.99, 1.25) |
| EPTC                              | 1.07 (0.94, 1.20) |
| Glyphosate                        | 1.34 (1.18, 1.53) |
| Imazethapyr                       | 0.93 (0.82, 1.04) |
| Metolachlor                       | 1.01 (0.91, 1.11) |
| Paraquat                          | 1.12 (0.98, 1.28) |
| Pendimethalin                     | 1.03 (0.93, 1.14) |
| Petroleum distillates             | 1.14 (1.03, 1.27) |



|             |                   |
|-------------|-------------------|
| Trifluralin | 1.09 (0.96, 1.23) |
| 2,4-D       | 1.11 (0.97, 1.28) |
| 2,4,5-T     | 1.25 (1.09, 1.43) |
| 2,4,5-TP    | 0.85 (0.71, 1.03) |
| Atrazine    | 1.09 (0.96, 1.24) |
| Cyanazine   | 1.02 (0.91, 1.13) |
| Metribuzin  | 1.03 (0.91, 1.16) |

Abbreviation: 2,4-D, 2,4-Dichlorophenoxyacetic acid; 2,4,5-T, 2,4,5-Trichlorophenoxyacetic acid; 2,4,5-T,P, 2-(2,4,5-trichlorophenoxy) propionic acid; CI, Confidence Intervals; CCl<sub>4</sub>/CS<sub>2</sub>, Carbon tetrachloride/Carbon disulfide 80/20 mix; DDT, Dichlorodiphenyltrichloroethane; EPTC, S-Ethyl dipropylthiocarbamate; OI, Olfactory Impairment; OR, Odds Ratio

Odds ratios are adjusted for age, sex, state of residence, education, smoking status, ever performed following tasks at least once each year (repair engines, replace asbestos brake linings, handle stored grain, work in swine confinement areas, weld and paint), and correlated pesticides (correlated ever-use of pesticides with Spearman correlation  $\geq 0.40$ )

<sup>a</sup>Numerator of stabilized weights estimated as a marginal probability of overall participation in the third follow-up and denominator estimated as a probability of overall participation conditional on specific pesticide (that considered as exposure), age, sex, state of residence, education, smoking status, and ever performed following tasks at least once each year (repair engines, replace asbestos brake linings, handle stored grain, work in swine confinement areas, weld and paint)
